# Supplementary material for: Solving poverty or tackling healthcare inequalities? Qualitative study exploring local interpretations of national policy on health inequalities under new NHS reforms in England
Source: PubMed Central journal article supplement — BMJ Open. 2024 Apr 8;14(4):e081954. doi: 10.1136/bmjopen-2023-081954 (PMC11015303; doi:10.1136/bmjopen-2023-081954), 2024-04-08
Supplement: bmjopen-2023-081954.draft_revisions.pdf [file bmjopen-2023-081954.draft_revisions.pdf]

# BMJ Open

BMJ Open is committed to open peer review. As part of this commitment we make the peer review history of every article we publish publicly available.

When an article is published we post the peer reviewers' comments and the authors' responses online. We also post the versions of the paper that were used during peer review. These are the versions that the peer review comments apply to.

The versions of the paper that follow are the versions that were submitted during the peer review process. They are not the versions of record or the final published versions. They should not be cited or distributed as the published version of this manuscript.

BMJ Open is an open access journal and the full, final, typeset and author-corrected version of record of the manuscript is available on our site with no access controls, subscription charges or pay-per-view fees (<http://bmjopen.bmj.com>).

If you have any questions on BMJ Open's open peer review process please email [info.bmjopen@bmj.com](mailto:info.bmjopen@bmj.com)

# BMJ Open

**Solving poverty or tackling health care inequalities?  
Qualitative study exploring local interpretations of national  
policy on health inequalities under new NHS reforms in  
England**

|                               |                                                                                                                                                                                                                                                |
|-------------------------------|------------------------------------------------------------------------------------------------------------------------------------------------------------------------------------------------------------------------------------------------|
| Journal:                      | <i>BMJ Open</i>                                                                                                                                                                                                                                |
| Manuscript ID                 | bmjopen-2023-081954                                                                                                                                                                                                                            |
| Article Type:                 | Original research                                                                                                                                                                                                                              |
| Date Submitted by the Author: | 10-Nov-2023                                                                                                                                                                                                                                    |
| Complete List of Authors:     | Alderwick, Hugh; Health Foundation, London ,<br>Hutchings, Andrew; London School of Hygiene and Tropical Medicine<br>Mays, Nicholas; London School of Hygiene and Tropical Medicine, Public<br>Health and Policy                               |
| Keywords:                     | Health policy < HEALTH SERVICES ADMINISTRATION & MANAGEMENT,<br>Public health < INFECTIOUS DISEASES, Organisation of health services<br>< HEALTH SERVICES ADMINISTRATION & MANAGEMENT, Health Equity,<br>Health Services, QUALITATIVE RESEARCH |
|                               |                                                                                                                                                                                                                                                |

SCHOLARONE™  
Manuscripts

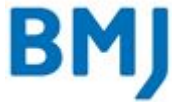

I, the Submitting Author has the right to grant and does grant on behalf of all authors of the Work (as defined in the below author licence), an exclusive licence and/or a non-exclusive licence for contributions from authors who are: i) UK Crown employees; ii) where BMJ has agreed a CC-BY licence shall apply, and/or iii) in accordance with the terms applicable for US Federal Government officers or employees acting as part of their official duties; on a worldwide, perpetual, irrevocable, royalty-free basis to BMJ Publishing Group Ltd ("BMJ") its licensees and where the relevant Journal is co-owned by BMJ to the co-owners of the Journal, to publish the Work in this journal and any other BMJ products and to exploit all rights, as set out in our [licence](#).

The Submitting Author accepts and understands that any supply made under these terms is made by BMJ to the Submitting Author unless you are acting as an employee on behalf of your employer or a postgraduate student of an affiliated institution which is paying any applicable article publishing charge ("APC") for Open Access articles. Where the Submitting Author wishes to make the Work available on an Open Access basis (and intends to pay the relevant APC), the terms of reuse of such Open Access shall be governed by a Creative Commons licence – details of these licences and which [Creative Commons](#) licence will apply to this Work are set out in our licence referred to above.

Other than as permitted in any relevant BMJ Author's Self Archiving Policies, I confirm this Work has not been accepted for publication elsewhere, is not being considered for publication elsewhere and does not duplicate material already published. I confirm all authors consent to publication of this Work and authorise the granting of this licence.

**TITLE**

*Solving poverty or tackling health care inequalities? Qualitative study exploring local interpretations of national policy on health inequalities under new NHS reforms in England*

**Authors**

Hugh Alderwick (corresponding author), Health Foundation,<sup>i</sup> London School of Hygiene and Tropical Medicine<sup>ii</sup> ([Hugh.Alderwick@health.org.uk](mailto:Hugh.Alderwick@health.org.uk))

Andrew Hutchings, London School of Hygiene and Tropical Medicine<sup>ii</sup>  
([Andrew.Hutchings@lshtm.ac.uk](mailto:Andrew.Hutchings@lshtm.ac.uk))

Nicholas Mays, London School of Hygiene and Tropical Medicine<sup>ii</sup> ([Nicholas.Mays@lshtm.ac.uk](mailto:Nicholas.Mays@lshtm.ac.uk))

**Word count:** 5,376

**Figures and tables:** 0

For peer review only

---

<sup>i</sup> Health Foundation, 8 Salisbury Square, London, EC4Y 8AP, UK

<sup>ii</sup> London School of Hygiene and Tropical Medicine, 15-17 Tavistock Place, London, WC1H 9SH, UK

1  
2  
3 **1 TITLE**

4 **2** *Solving poverty or tackling health care inequalities? Qualitative study exploring local interpretations*  
5 **3** *of national policy on health inequalities under new NHS reforms in England*

6  
7 **4 ABSTRACT**

8  
9 **5 Objectives.** Major reforms to the organization of the NHS in England established 42 integrated care  
10 **6** systems (ICSs) to plan and coordinate local services. The changes are based on the idea that cross-  
11 **7** sector collaboration is needed to improve health and reduce health inequalities—and similar policy  
12 **8** changes are happening elsewhere in the UK and internationally. We explored local interpretations of  
13 **9** national policy objectives on reducing health inequalities among senior leaders working in three ICSs.

14  
15 **10 Design.** We carried out qualitative research based on semi-structured interviews with NHS, public  
16 **11** health, social care, and other leaders in three ICSs in England.

17  
18 **12 Setting and participants.** We selected three ICSs with varied characteristics all experiencing high  
19 **13** levels of socioeconomic deprivation. We conducted 32 in-depth interviews with senior leaders of  
20 **14** NHS, local government, and other organizations involved in the ICS's work on health inequalities.  
21 **15** Our interviewees comprised 17 leaders from NHS organizations and 15 leaders from other sectors.

22  
23 **16 Results.** Local interpretations of national policy objectives on health inequalities varied, and local  
24 **17** leaders had contrasting—sometimes conflicting—perceptions of the boundaries of ICS action on  
25 **18** reducing health inequalities. Translating national objectives into local priorities was often a challenge,  
26 **19** and clarity from national policymakers was frequently perceived as limited or lacking. Across the  
27 **20** three ICSs, local leaders worried that objectives on tackling health inequalities were being crowded  
28 **21** out by other short-term policy priorities, such as reducing pressures on NHS hospitals. The behaviour  
29 **22** of national policymakers appeared to undermine their stated priorities to reduce health inequalities.

30  
31 **23 Conclusions.** Varied and vague interpretations of NHS policy on health inequalities are not new, but  
32 **24** lack of clarity among ICS leaders brings major risks—including interventions being poorly targeted or  
33 **25** inadvertently widening inequalities. Greater conceptual clarity is likely needed to guide ICS action in  
34 **26** future.

35  
36  
37 **28 Strengths and limitations of this study**

- 38  
39 - This is a qualitative study providing in-depth insights from senior leaders in England's new  
40 **30** ICSs—including leaders from NHS, local government, and other community-based organizations.  
41 **31** - Our structured sampling approach meant we were able to carry out interviews in three ICSs with  
42 **32** varied characteristics all experiencing high levels of socioeconomic deprivation.  
43 **33** - Our findings represent specific experiences of leaders in three areas of England where reducing  
44 **34** inequalities may be high on the agenda, rather than general experiences of ICSs nationally.  
45 **35** - We carried out our fieldwork soon after the reforms, so our research represents leaders' initial  
46 **36** interpretations of ICS policy objectives on health inequalities, which are likely to evolve.

47  
48  
49 **38 INTRODUCTION**

50  
51 The Health and Care Act 2022 introduced major changes to the rules and structures of the NHS in  
52 **40** England, undoing components of the market-based reforms introduced by the Coalition government a  
53 **41** decade earlier.<sup>1,2</sup> The changes are based on the idea that cross-sector collaboration is needed to  
54 **42** improve health and reduce health inequalities. Since July 2022, 42 integrated care systems (ICSs)—  
55 **43** area-based partnerships between the NHS, social care, public health, and other services in England—  
56 **44** have been responsible for planning and coordinating health and care services for populations of  
57 **45** around 500,000 to 3 million people.<sup>3</sup> Each ICSs is made up of a new NHS body and wider committee  
58 **46** of NHS, local government, and other agencies. The reforms build on a long history of policies on  
59 **47** cross-sector collaboration on health,<sup>4</sup> and echo policy changes across the UK and in other countries.<sup>5,6</sup>

1  
2  
3 48 ICSs have been given explicit objectives by national policymakers to reduce health inequalities. Gaps  
4 49 in life expectancy between the most and least socially disadvantaged groups in England are wide and  
5 50 growing,<sup>7,8</sup> and there are inequalities in access to high quality health care.<sup>9,10,11</sup> One of the four ‘core  
6 51 purposes’ of ICSs—defined by NHS England, the national body responsible for the day-to-day  
7 52 running of the English NHS—is to ‘tackle inequalities in outcomes, experience, and access’.<sup>12</sup> NHS  
8 53 bodies and new ICSs have various legal duties on health inequalities: some broad (such as to consider  
9 54 the effects of their decisions on inequalities in population health and wellbeing), some more specific  
10 55 (such as to reduce inequalities in access to health services).<sup>1,13</sup> NHS England has also produced broad  
11 56 guidance for ICSs on reducing inequalities, setting out priorities for ‘recovering’ services affected by  
12 57 covid-19<sup>14</sup> and target groups for action on health care inequalities (including the 20% most deprived  
13 58 of the population and people with selected clinical conditions—an approach known as core20plus5).<sup>15</sup>  
14 59 Modest additional funding (£200m nationally in 2022-23) has been provided to support these efforts.<sup>16</sup>

16 60 ICSs are the latest in a long line of local partnerships tasked with delivering national policy objectives  
17 61 on health inequalities.<sup>4</sup> For example, a mix of area-based partnerships between the NHS, local  
18 62 government, and other agencies was established to improve health and reduce health inequalities  
19 63 under Labour governments from 1997 to 2010—including Health Action Zones,<sup>17,18</sup> Sure Start Local  
20 64 Programmes,<sup>19,20</sup> Local Strategic Partnerships,<sup>21,22</sup> and more—as part of a broader national strategy to  
21 65 reduce gaps in life expectancy and infant mortality between richer and poorer areas in England.<sup>23,24,25</sup>  
22 66 More recently, the NHS Long Term Plan in 2019 committed to stronger NHS action on health  
23 67 inequalities,<sup>26</sup> and partnerships between the NHS, local government, and community-based  
24 68 organizations—early versions of ICSs—were asked to develop local plans for how to do it.<sup>27</sup>

26 69 But translating national policy into local action is not easy. Health inequalities are complex<sup>28</sup> and  
27 70 policy objectives to reduce them are often ambiguous, partial, and shifting.<sup>29,30,31</sup> Health leaders have  
28 71 competing interpretations of the problem to be solved—for instance, between ‘individualized’ and  
29 72 broader structural interpretations of inequalities.<sup>32,33</sup> And local plans for action on health inequalities  
30 73 are often vague.<sup>34,35,18</sup> Even then, policy objectives to tackle health inequalities are rarely matched  
31 74 with the resources needed to achieve them,<sup>36,37</sup> and are repeatedly drowned out by higher profile and  
32 75 short-term political priorities, like reducing NHS waiting times or balancing hospital budgets.<sup>38,39</sup>

34 76 How policy problems are framed and understood shapes action to address them.<sup>40,41,42,43</sup> Competing  
35 77 problem definitions interact and evolve.<sup>40,41</sup> And lack of clarity on aims and objectives can hold back  
36 78 collaboration between local agencies expected to work together to deliver them.<sup>4</sup> Previous studies  
37 79 have examined how past national policies on health inequalities in England have been interpreted by  
38 80 local leaders,<sup>38,29,44,45</sup> as well as individual and organizational perspectives on health inequalities in the  
39 81 UK and elsewhere.<sup>32,46,47,48,49,50</sup> More recently, researchers have analysed how health inequalities are  
40 82 conceptualized in local health planning documents<sup>34,35,51</sup> and tracked the early development of ICSs in  
41 83 England.<sup>52,53,54,55</sup> But in-depth understanding of how England’s new ICSs are interpreting national  
42 84 policy on health inequalities is limited. We conducted qualitative research with NHS, public health,  
43 85 social care, and other leaders in three more socioeconomically deprived ICSs to gain insight into local  
44 86 interpretations of national health inequalities objectives, how inequalities relate to other priorities, and  
45 87 how these interpretations vary.

## 48 88 **METHODS**

### 49 89 **Design and sample**

50 90 We used qualitative methods to explore local interpretations of national policy objectives on health  
51 91 inequalities among senior leaders involved in England’s new ICSs. Our sample comprised 32 leaders  
52 92 from NHS, social care, public health, and community-based organizations in three ICS areas.

54 93 We identified a purposive sample of ICSs with varied characteristics experiencing high levels of  
55 94 socioeconomic deprivation. We collated a mix of publicly available data on the characteristics of each  
56 95 of England’s 42 ICSs<sup>3</sup>—including geographical context (NHS region and proportion of rural/urban  
57 96 areas), population size, organizational complexity (number of NHS trusts and upper tier local  
58 97 authorities), policy context (number of sites involved in relevant policy initiatives in the ICS, and the  
59 98 date the early version of the ICS was established), and socioeconomic deprivation (proportion of the  
60 99 ICSs’ lower super output areas (LSOAs) in the most deprived 20% of areas nationally, using index of

100 multiple deprivation (IMD) ranks). We selected these characteristics because of evidence on their  
101 likely relevance to how organizations in ICSs work together to reduce health inequalities.<sup>56,3</sup>

102 We used these data to identify a sub-group of 14 ICSs experiencing the highest concentration of  
103 socioeconomic deprivation relative to other ICSs in England (the top tercile of ICSs with the highest  
104 concentration of LSOAs in most deprived 20% of areas nationally). National NHS bodies are seeking  
105 to reduce health inequalities by targeting efforts on the most deprived groups<sup>15</sup>—and areas with  
106 similar levels of socioeconomic deprivation may pursue common approaches. We then identified  
107 three ICSs within this sub-group that varied in population size (which is strongly correlated with  
108 organizational complexity), geographical region, rurality, and policy context—for example, by  
109 avoiding selecting all three sites from an early ‘wave’ of NHS England’s ICS programme (NHS  
110 England established early ICSs in waves based on perceived ‘maturity’<sup>57</sup> of local partnerships). This  
111 gave us a relatively heterogenous mix of three ICSs all serving more socioeconomically deprived  
112 populations. ICS leaders from the three areas we selected all agreed to participate in the research.

113 In each ICS, we conducted in-depth interviews with senior leaders of NHS, local government, and  
114 other organizations involved in the ICS’s work on health inequalities. This included leaders from  
115 NHS integrated care boards (ICBs) (such as ICB chief executives and directors of strategy), NHS  
116 providers (such as NHS Trust chief executives and GPs), local authorities (such as directors of public  
117 health and adult social care), and other community-based organizations (such as leaders of charities  
118 working with the ICS to represent the public or provide services)—as well as those involved in the  
119 day-to-day management of ICS work on health inequalities. Participants were identified through web-  
120 based research and snowball sampling.<sup>58</sup> Our sample comprised 17 leaders from NHS organizations  
121 (including those working within the ICB) and 15 from local government or other organizations  
122 outside the NHS. We describe all research participants as ‘leaders’ when reporting the results.

123 ICSs are complex systems involving a mix of organizations and partnerships between them. ICSs  
124 themselves are made up of two bodies: ICBs (area-based NHS agencies responsible for controlling  
125 most NHS resources to improve health and care for their local population) and integrated care  
126 partnerships (looser collaborations between NHS, local government, and other agencies, responsible  
127 for developing an integrated care plan to guide local decisions—including those of the ICB). ICSs are  
128 expected to deliver their objectives through the work of both bodies and other local agencies.<sup>3,12,59</sup> In  
129 our research, we focused on interpretations of policy objectives and priorities for the ICS as a whole.

### 130 **Data collection and analysis**

131 We used a semi-structured interview guide with questions on leaders’ interpretation of national policy  
132 objectives on health inequalities, local priorities, and how these linked to other objectives for the ICS.  
133 All participants gave informed consent. Interviews were carried out online, lasted an average of 44  
134 minutes, and took place between August and December 2022. All interviews were recorded,  
135 professionally transcribed, and anonymized at the point of transcription. We analyzed the data using  
136 the constant comparative method of qualitative analysis.<sup>58</sup> We reviewed the transcripts line by line to  
137 identify themes in the data, and refined them iteratively as new concepts emerged. All authors (HA,  
138 NM, AH) reviewed a sample of the transcripts and worked collaboratively to develop the code  
139 structure. We used an integrated approach to do this based on the themes identified in the data and key  
140 domains in our interview guide.<sup>60</sup> One author (HA) then analyzed all transcripts and the authors met  
141 regularly to discuss interpretation of the data and any changes to the coding framework. We used  
142 NVivo (release 1.3) to facilitate our analysis of the data.

### 143 **Patient and public involvement**

144 No patients or members of the public were involved in this study.

## 145 **RESULTS**

146 We found varied interpretations of policy objectives on health inequalities—both within and between  
147 ICS areas. Leaders had different perceptions of the boundaries of ICS action on health inequalities—  
148 particularly the balance between action on health care and wider health inequalities. Leaders  
149 everywhere worried that action on health inequalities would be crowded out by other priorities.

### 150 **Varied and vague interpretations**

151 Interpretations of national policy objectives on health inequalities varied. Some leaders interpreted  
 152 national policy objectives for ICSs broadly—for example, as being about tackling poverty, improving  
 153 social and economic conditions, and reducing inequalities in life expectancy. One NHS leader in ICS  
 154 C said they were focusing on poverty as the ‘core driver of the vast majority of health inequalities  
 155 we’re facing’. Another said, while clinical priorities and access to preventive services were important,  
 156 ‘we’ve really tried to go at social, you know, broader determinants of health type perspectives’.

157 Others conceptualized ICSs’ role on health inequalities as a mix of linked objectives within the NHS  
 158 and beyond. A local authority leader in ICS B, for example, described how the ICS had a role in  
 159 ‘tackling clinical inequality’ (such as improving diabetes outcomes for marginalized groups),  
 160 reducing inequalities in risk factors for ill-health (such as physical activity), and acting on the ‘wider  
 161 determinants of health’. An NHS leader in ICS A described similar objectives to prevent disease,  
 162 reduce health care inequalities, and support action to improve social and economic conditions.

163 But several leaders were struggling to interpret national policy objectives. A local authority leader in  
 164 ICS C said they were unsure which inequalities they were supposed to prioritize—for instance,  
 165 inequalities within the ‘places’ that made up their ICS, inequalities between these places, or  
 166 inequalities between their ICS and the rest of the country. Another said leaders were ‘struggling to  
 167 whittle down the big amorphous blob of health inequalities into some actual things that we can do’—  
 168 and ‘going round in circles’ trying to do it. An NHS leader in ICS A said they were ‘still working it  
 169 out’, while others pointed to governance structures or planning processes instead of their  
 170 interpretation of national policy objectives on health inequalities or planned action to address them.

171 Translating national policy objectives into local priorities was often a challenge. ICS leaders were in  
 172 the process of developing their strategies when we carried out our interviews. Some could point to  
 173 high level objectives on reducing health inequalities, such as reducing gaps in healthy life expectancy,  
 174 or priority areas, such as improving mental health services. But others said it was too early to  
 175 articulate priorities or felt in the dark about the process to develop them. Some felt their ICS’s  
 176 priorities on health inequalities were vague. An NHS leader in ICS A, for instance, said:

177 *‘I’ve been to a few meetings and [leader’s name], they all trot out the whole “la la, core20PLUS5,*  
 178 *we’re going to do this, we’re going to make everything better”, but I haven’t heard anything specific, I*  
 179 *haven’t heard anybody mention anything rather than just sound bites, in all honesty.’*  
 180 —NHS leader, ICS A.

181 National guidance for ICSs did not always help provide clarity. Several leaders mentioned NHS  
 182 England’s core20plus5 framework, which identifies priority groups for action on reducing health  
 183 inequalities, including the 20% most deprived of the population and people with selected clinical  
 184 conditions. Some found the framework a helpful starting point for local plans. But others thought it  
 185 focused too narrowly on clinical priorities, might not fit their local context, or risked widening  
 186 inequalities (if the focus was on targeting the 20% most deprived in each ICS rather than nationally).  
 187 More broadly, leaders often thought national guidance for ICSs on health inequalities was vague:

188 *‘Other than the usual broad brush, “oh, integrated working” and, you know, [...] “system*  
 189 *leadership” and they bandy terms around, like this – personalised care, that’s another one. They all*  
 190 *talk about these kind of things and then we actually say, “alright then, well what do you mean?”*  
 191 *There’s not very much under that.’*  
 192 —NHS leader, ICS A.

193  
 194 *‘I think the thing that I see most of, and I don’t know what its status is, is the kind of core twenty plus*  
 195 *five work. That seems to have some level of visibility. Even if I don’t really understand what it means*  
 196 *in, kind of, how it translates. But beyond that, no I don’t have clarity on what the ask is.’*  
 197 —Local authority leader, ICS C.

199 Lack of clarity was not always seen as a drawback by local leaders, given they often wanted  
 200 flexibility to address local needs. But several worried about unintended consequences—including lack



201 of clarity on ICS objectives on health inequalities skewing priorities towards other high-profile areas  
 202 (such as objectives to increase elective care activity), or misinterpretation and inconsistent  
 203 implementation of policy objectives between ICSs (such as national policy to reduce NHS waiting  
 204 lists ‘inclusively’).

205  
 206 **Health care versus health inequalities**

207 Lack of clarity about policy objectives contributed to conflicting views about the primary role of ICSs  
 208 and where they should focus their attention. A major tension running throughout our interviews was  
 209 differing perceptions of the boundaries of ICS action on health inequalities—particularly how far the  
 210 ICS should extend its focus beyond reducing health care inequalities (such as differences in access to  
 211 care) to address the broader social and economic conditions shaping health inequalities (such as  
 212 housing conditions). Varying interpretations could be found within ICS areas and professional groups.

213  
 214 For some, ICSs would only succeed if they looked beyond health care services:

215  
 216 *‘Over many years [...] they’ve been really probably the national ill health service, focussing in on*  
 217 *treating illness and disease as opposed to thinking about primary prevention and working more*  
 218 *effectively with public health on how do we get population health outcomes improved and therefore*  
 219 *reduce health inequalities. And that lens of the wider determinants of health is to my mind the right*  
 220 *lens to be looking through in order to improve population health outcomes.’*

221 —Local authority leader, ICS C.

222  
 223 Others described how their ICS needed to do both—combining action on reducing health care  
 224 inequalities with broader efforts to tackle underlying social and economic conditions in their area:

225  
 226 *‘You just look at the healthy life expectancy across the patch and you can see the inequity. You look at*  
 227 *things like vaccine uptake, screening uptake, and they’re some of the, kind of, proxy measures that you*  
 228 *can see that maybe start to explain some of the differences in life expectancy. You look at smoking*  
 229 *rates, obesity rates, alcohol, all of that kind of stuff, unemployment, housing situation, and you start to*  
 230 *get to grips as to why, and, as I say, it’s clear that it’s issues greater than just what the health service*  
 231 *can manage, so it needs that integrated approach.’*

232 —NHS leader, ICS A.

233  
 234 But several leaders—particularly from local government—wanted their ICS to focus primarily on  
 235 health care inequalities, and worried about the consequences of NHS leaders misinterpreting their role  
 236 and purpose:

237  
 238 *‘I think there’s something for me about ensuring that the ICS is absolutely focused on healthcare*  
 239 *inequalities as its first and foremost responsibility. Get the inequalities within the NHS, what’s in their*  
 240 *grasp. [...] They’re not going to solve poverty at an ICS level.’*

241 —Local authority leader, ICS A.

242  
 243 *‘It’s an easy get out to say, you know, “Marmot says that it’s the social determinants that matter*  
 244 *most”. Well then, and “we need to focus on housing and jobs and things”. Well, the ICS doesn’t do*  
 245 *much, doesn’t have big levers on housing and jobs and stuff, so yes, we can do a bit on anchor work,*  
 246 *but it’s fairly marginal to what we can do to actually try and ensure that our services strive to have*  
 247 *the most equitable access and outcomes for our residents.’*

248 —Local authority leader, ICS C.

249  
 250 *‘I think there is a misconception about what is the role of the NHS in tackling health inequalities. [...]*  
 251 *I always kind of giggle in the background, some people might discover health inequalities, and then*  
 252 *they go, “you know, we need to solve poverty” and you go “Christ, that’d be great. In the meantime,*  
 253 *can you just make sure your services are open on an evening and actually the transport routes are*  
 254 *fine, and actually the literacy levels of your leaflets are not of a reading age of a 20-year-old?”*

255 —Local authority leader, ICS A.

256  
 257 These differences in interpretation created potential conflict between leaders and organizations. Some  
 258 described the risk of the NHS ‘stepping on toes’ or failing to acknowledge others’ skills and expertise.  
 259 Others worried about NHS leaders framing health inequalities as ‘new’ and the risk of alienating local  
 260 authorities and others with a long history of working to address them. One NHS leader described how:

261 *‘I just had a conversation with the DPH [...] We were talking about some of the wider determinant*  
 262 *stuff and she said, “Well, you know, of course, that's not really the NHS's business”, you know,*  
 263 *“We've got all this in our strategies” you know? So, it was just a little bit of a [...] Just a gentle, sort*  
 264 *of, shove back.’*  
 265 —NHS leader, ICS C.

266 Tension was not always seen as a bad thing. An NHS leader in ICS C gave the example of learning to  
 267 dance with a partner, saying ‘you have to acknowledge that you will stand on each other's bloody  
 268 toes, you know’, otherwise ‘you don't move anywhere and you don't learn anything’. Several leaders  
 269 described ongoing conversations in their ICS to define roles and responsibilities of different  
 270 organizations, including work in one area to define the contribution of public health professionals in  
 271 the ICS. And public health leaders frequently described their efforts to help other partners in their ICS  
 272 understand different kinds of health inequalities and potential approaches to reducing them.

### 273 **Threaded throughout or crowded out?**

274 Whatever their interpretation of the boundaries of ICS action on health inequalities, leaders often  
 275 conceptualized reducing health inequalities as a cross-cutting objective linked to other ICS priorities:

276 *‘So I think whenever we discuss anything, we've got this absolute agreement we need to look at it*  
 277 *through... so we always look at things through a financial lens, a quality lens, but I think we also need*  
 278 *to start – whatever we do – we look through a health inequalities lens. Is this a line to our strategic*  
 279 *aim of reducing health inequalities, no matter what it is?’*  
 280 —NHS leader, ICS A.

281  
 282 *‘I mean it runs through everything, it literally runs through everything doesn't it, this inequalities*  
 283 *work. Every single strategy, every single plan is what we are looking to make a shift on in terms of*  
 284 *this agenda.’*  
 285 —Local authority leader, ICS B.

286  
 287 *‘I think we need to get to a strategy which clearly puts population health management and*  
 288 *understanding and tackling health inequalities as the core of our overarching strategy, and*  
 289 *inequalities needs to be threaded through all of our other pieces of work.’*  
 290 —NHS leader, ICS C.

291  
 292 But—in reality—leaders frequently described how other priorities risked crowding out action on  
 293 health inequalities. Interviewees in every ICS described how responding to acute pressures in the  
 294 NHS and social care, such as long waiting lists for elective care, tended to dominate the agenda. This  
 295 ‘crowding out’ effect happened at a mix of levels—from senior leaders to front-line staff. An NHS  
 296 leader in ICS B, for example, described how the limited ‘bandwidth’ of the ICS team was being taken  
 297 up with a series of meetings on ambulance response times, elective waiting lists, and other operational  
 298 pressures—and said they were ‘increasingly spending more time on those short-term issues’ over  
 299 longer-term objectives. Another NHS leader in ICS C described how their clinicians ‘would love to be  
 300 spending more time’ on initiatives to reduce health inequalities, such as a local programme where  
 301 respiratory consultants visited a community hub to provide clinical advice alongside other services  
 302 focused on housing, food, benefits, and other social needs—‘but they are saying we can't because  
 303 we've got these clinics to do and we've got these patients’ to see and we've got a full ED department’.

304  
 305 Leaders gave a mix of explanations for this crowding out effect. One was that pressures on the NHS,  
 306 like long ambulance response times, were the most visible priorities. Another was that pressures on  
 307 the NHS were so extreme—so ‘unacceptably bad’, as one local authority leader in ICS A put it—that

308 short-term action to address them was understandable, and might even be needed to create space for  
 309 work on health inequalities. One NHS leader in ICS C said: ‘if we don’t get through winter, then, you  
 310 know, nobody’s going to give us the time of day to do the other stuff’. Others pointed to the lack of  
 311 resources—people and money—to deliver objectives on health inequalities. An NHS leader in ICS A  
 312 described the risk ‘that the secondary care hospital sector sucks every possible penny of growth’.

313  
 314 But the approach of national policymakers was also identified as a major factor shaping local  
 315 priorities and behaviour. Despite the presence of health inequalities in national policy documents,  
 316 local leaders frequently described how the overriding focus from national NHS bodies and politicians  
 317 was on holding ICSs to account for NHS performance—a focus that appeared to be increasing:

318  
 319 *‘I don’t think I’ve had a conversation on health inequalities or population health with NHS England  
 320 since we’ve been in existence, but I’d need more than my fingers and toes to count the number of  
 321 conversations I’ve had on ambulance handover. We’re really being driven to be focused on optimising  
 322 the existing system’s delivery.’*

323 —NHS leader, ICS A.

324  
 325 *‘I mean, the chair of the ICS, [name], I think is fine. I think [they] gets it but, of course, you know, the  
 326 way the NHS, because they’re part of the NHS, the NHS is the NHS, so, they call the chiefs and chief  
 327 executives in and berate them for their performance on ambulances. You know what I mean? That’s  
 328 the top of the priority. I don’t know if they even talk at these meetings about inequalities, you know?  
 329 It’s all about performance.’*

330 —Local authority leader, ICS B.

331  
 332 *‘I cannot explain in seven weeks, eight weeks, how much their focus has changed, it’s unbelievable.  
 333 It’s almost as if, if you came into one job as an ICB chief exec, and you’ve got another job now, which  
 334 is basically being the chief operating officer for the system, and that is the absolute focus from them,  
 335 you know. So I’m on, you know, regular phone calls with them about those short-term issues, whether  
 336 it’s private care access, ambulance turnaround times, 104 week wait, 78 week waits, cancer waiting  
 337 times. That is the absolute focus.’*

338 —NHS leader, ICS B.

## 339 DISCUSSION

340 We analysed local interpretations of national health inequalities objectives in three more  
 341 socioeconomically deprived ICSs in England. Overall, we found local interpretations of policy  
 342 objectives on health inequalities varied, and local leaders had contrasting—sometimes conflicting—  
 343 perceptions of the boundaries of ICS action. Translating national objectives into local priorities was  
 344 often a challenge, and clarity from national policymakers was frequently perceived as limited or  
 345 lacking. Across the three ICSs, local leaders worried that objectives on reducing health inequalities  
 346 were being crowded out by other policy priorities, such as pressures on NHS hospitals. The behaviour  
 347 of national policymakers appeared to undermine their stated priorities on reducing health inequalities.

348 Vagueness in NHS policy on health inequalities is nothing new. National NHS bodies in England  
 349 committed to stronger action to reduce health inequalities in 2019,<sup>26,27</sup> but lacked a systematic  
 350 approach to achieving it<sup>31</sup> and expected local leaders—early versions of ICSs—to develop their own  
 351 approaches. Olivera et al analysed the local plans that followed and found health inequalities were  
 352 conceptualized vaguely and inconsistently, echoing the broader vagueness in national NHS policy.<sup>30</sup>  
 353 In 2012, Warwick-Giles et al found that the NHS’s new clinical commissioning groups—  
 354 organizations established to purchase local health services under the Lansley reforms in 2012, before  
 355 being scrapped under the latest round of NHS reforms in 2022—were unclear on their duties to tackle  
 356 health inequalities, and suffered from limited guidance from national policymakers.<sup>49</sup> Looking further  
 357 back, Exworthy and Powell found similarly ‘muddy’ NHS objectives on health inequalities in the  
 358 1990s and 2000s.<sup>29</sup> This is, perhaps, unsurprising. How local agencies ‘translate’ national policy in  
 359 their own context is a central part of the policy process—and often an intentional policy feature.<sup>61,62,63</sup>  
 360 Varied understandings of concepts linked to health inequalities and their causes are widespread.<sup>64</sup>32

1  
2  
3 361 But lack of clarity among ICS leaders on health inequalities brings major risks. Health inequalities are  
4 362 complex and deeply rooted. Reducing them is challenging, but possible.<sup>65,66</sup> Yet progress on reducing  
5 363 health inequalities will not happen unless national and local agencies take a coherent and systematic  
6 364 approach—including clarity on the ‘problem’ to be addressed, priorities and principles for action, and  
7 365 potential interventions at different levels.<sup>31,67,68</sup> Without this, there is a risk of interventions being  
8 366 poorly targeted, conflict and confusion between local agencies, and broad strategies that fail to  
9 367 translate into action. ICSs may even inadvertently widen inequalities—for instance, if some groups  
10 368 receive disproportionate attention, individual-level interventions are pursued without wider system-  
11 369 level changes, or efforts to tackle inequalities within ICSs are not matched with wider policy to reduce  
12 370 inequalities between them.<sup>30,31,69,70</sup> National NHS bodies have produced guidance for ICSs on reducing  
13 371 health inequalities, including priorities for ‘recovering’ services after covid-19 and the core20plus5  
14 372 framework.<sup>15,16</sup> But our research suggests that more clarity is needed to guide ICS action—including  
15 373 the respective roles of NHS-led ICBs and other partnership groups and bodies at a local level.

17 374 Some of these risks appeared to be playing out already in our research. A major unresolved tension  
18 375 among local leaders was differing perceptions of the boundary for ICS action on health inequalities—  
19 376 particularly how far the ICS should extend its focus beyond reducing health care inequalities (such as  
20 377 differences in access to health care) to address the broader social and economic conditions shaping  
21 378 health inequalities (such as housing conditions). Studies often report that health system leaders  
22 379 predominantly focus on individual-level interpretations of health inequalities—for instance,  
23 380 emphasizing individual risk factors for ill-health and the importance of improving access to services.<sup>32</sup>  
24 381 Recent analysis of local health system plans in England, produced by early versions of ICSs, also  
25 382 found that areas tended to frame action on preventing ill-health and reducing health inequalities  
26 383 narrowly—for instance, focusing on individual behaviour change or better disease management.<sup>30,35</sup>

28 384 Our research painted a more complex picture. Leaders from across professional groups—including the  
29 385 NHS, public health, and social care—held varied views about ICSs’ remit on health inequalities. NHS  
30 386 leaders often emphasized social and economic factors, like poverty or housing, as key drivers of  
31 387 health inequalities to be tackled by the ICS. Yet several local authority leaders were concerned about  
32 388 the NHS misunderstanding its role and focus—for instance, NHS leaders ‘discovering’ health  
33 389 inequalities and social determinants of health but failing to sufficiently recognize their primary role in  
34 390 tackling the health care inequalities more firmly within the NHS’s control. Unclear or unrealistic  
35 391 aims, competing agendas, and failure to understand other organizations’ expertise can all hold back  
36 392 partnership working.<sup>56</sup> NHS reforms in 2012 transferred public health functions out of the NHS and  
37 393 into local government.<sup>71,72</sup> Yet the complex structure of England’s new ICSs—each made up of  
38 394 several overlapping partnership bodies, including an NHS-led agency coupled with a broader  
39 395 partnership of local organizations—risks causing confusion.<sup>73</sup> There are also broader risks from  
40 396 greater NHS action on social determinants of health, such as medicalizing poverty and other social  
41 397 issues (for instance, by framing structural social issues as problems that can be diagnosed and treated  
42 398 by clinicians) and inefficient allocation of resources to address them.<sup>69,74</sup> Future research should  
43 399 explore this tension further and how the framing of NHS plans on health inequalities may be shifting.

46 400 Finally, our research highlights how ICS objectives on reducing health inequalities are being crowded  
47 401 out by higher profile policy objectives, such as reducing pressure on acute hospitals and improving  
48 402 ambulance performance. Pressures on the NHS are extreme: by September 2023, the waiting list for  
49 403 routine hospital treatment in England had reached almost 8 million—the highest since records  
50 404 began—and 28% of people attending emergency departments waited more than four hours to be  
51 405 seen.<sup>75</sup> Evidence from a long line of policy initiatives in England tells us that broader goals on  
52 406 improving health and reducing inequalities often fade as pressures on NHS services and finances  
53 407 increase.<sup>76-38</sup> Despite rhetoric about long-term policy, national NHS bodies and government  
54 408 frequently focus on ‘hard’ targets (like the size of waiting lists) and short-term political priorities  
55 409 instead.<sup>77,38,78</sup> Our research suggests the same phenomenon was happening to ICSs almost as soon as  
56 410 they were introduced.

## 58 411 **Limitations**

59 412 Our study has several limitations. First, we focused on gaining in-depth insights from three ICSs (out

of 42 in total), so our findings represent the specific experiences of leaders in these case study sites rather than general experiences of ICSs across England. However, our structured sampling approach meant we were able to target ICSs with varied characteristics all experiencing high levels of socioeconomic deprivation. Leaders in these ICSs are likely to be particularly aware of their role in reducing health inequalities—and our findings are likely to have strong relevance to ICSs serving similar populations.

Second, our interviews focused on senior leaders in ICSs. This meant we were able to understand the high-level perspectives of the most senior leaders responsible for overseeing and directing the ICSs work on health inequalities. Our sample included a diverse mix of leaders from NHS providers, ICBs, local authorities, and other community-based groups. But our research does not focus on the perspectives of people directly providing services or patients and service users experiencing inequalities.

Third, we carried out our fieldwork between August and December 2022—early in the evolution of ICSs (formally established in July 2022). This allowed us to understand leaders' perspectives as they developed their system's plans, and—in some cases—new teams to deliver them. But it also means our research represents leaders' initial interpretations of policy objectives on health inequalities—interpretations that are likely to evolve. That said, ICSs have existed informally for several years<sup>77,51,73</sup> and national policy initiatives over decades have encouraged local partnerships on health inequalities.<sup>4</sup>

## CONCLUSION

Reforms to the NHS in England established 42 integrated care systems responsible for planning and coordinating local health and care services. The changes are based on the idea that cross-sector collaboration is needed to improve health and reduce health inequalities—and similar policy changes are happening elsewhere in the UK and internationally. We used qualitative methods to explore local interpretations of national policy objectives on health inequalities in England among senior leaders working in three ICSs—including from the NHS, social care, public health, and community-based organizations. Local leaders had varying interpretations of national policy objectives and different views on the boundaries for ICS action. Clarity from national policymakers was frequently perceived as limited or lacking. Across all three ICS areas, local leaders were concerned that objectives on reducing health inequalities were being crowded out by other policy priorities. Our findings have implications for policy and practice—including the need for greater conceptual clarity as ICSs evolve.

---

## Funding statement

HA's research that contributed to this article was funded by the Health Foundation. HA is Director of Policy at the Health Foundation. This research received no specific grant from any funding agency in the public, commercial or not-for-profit sectors.

## Author contributions

HA, NM, and AH identified the research question and led the design and development of the study. HA carried out the interviews with ICS leaders. HA, NM, and AH reviewed interview transcripts, identified themes in the data, developed the code structure, and interpreted the data. HA coded and analysed all interview transcripts. HA wrote the first draft of the manuscript and incorporated comments from AH and NM. All authors read and approved the final manuscript. All authors are researchers in health policy and public health in the UK and have experience carrying out qualitative and mixed methods research—including research into similar policy initiatives in England.

## Competing interests

None declared.

## Ethics approval

NHS HRA approval for the study was granted on February 1 2022 (IRAS ID: 311479; REC ref: 22/HRA/0415). Ethical approval for the study was granted by the London School of Hygiene and

1  
2  
3 462 Tropical Medicine research ethics committee on February 22 2022 (LSHTM ethics ref: 26737). All  
4 463 participants gave informed consent before taking part in the study.  
5  
6  
7  
8  
9  
10  
11  
12  
13  
14  
15  
16  
17  
18  
19  
20  
21  
22  
23  
24  
25  
26  
27  
28  
29  
30  
31  
32  
33  
34  
35  
36  
37  
38  
39  
40  
41  
42  
43  
44  
45  
46  
47  
48  
49  
50  
51  
52  
53  
54  
55  
56  
57  
58  
59  
60

For peer review only

## REFERENCES

- 1 UK Government. Health and Care Act 2022. <https://bills.parliament.uk/bills/3022/publications>
- 2 Alderwick H, Gardner T, Mays N. England's new health and care bill. *BMJ*. 2021;374:n1767.
- 3 Dunn P, Fraser C, Williamson S, Alderwick H. Integrated care systems: what do they look like? Health Foundation. 2022. <https://www.health.org.uk/publications/long-reads/integrated-care-systems-what-do-they-look-like>
- 4 Alderwick H, Hutchings A, Mays N. A cure for everything and nothing? Local partnerships for improving health in England. *BMJ*. 2022;378:e070910.
- 5 Anderson M, Pitchforth E, Edwards N, Alderwick H, McGuire A, Mossialos E. United Kingdom: health system review. *Health Syst Transit*. 2022;24:1-194.pmid:35579557.
- 6 Alley DE, Asomugha CN, Conway PH, Sanghavi DM. Accountable health communities—addressing social needs through Medicare and Medicaid. *N Engl J Med*. 2016;374:8-11.
- 7 Raleigh V. What is happening to life expectancy in England? King's Fund. 2022. <https://www.kingsfund.org.uk/publications/whats-happening-life-expectancy-england>
- 8 Office for National Statistics. Health state life expectancies by national deprivation deciles, England: 2018 to 2020. 2022. <https://www.ons.gov.uk/peoplepopulationandcommunity/healthandsocialcare/healthinequalities/bulletins/healthstatelifeexpectanciesbyindexofmultipledeprivationimd/2018to2020>
- 9 Cookson R, Propper C, Asaria M, Raine R. Socio-economic inequalities in health care in England. *Fiscal Studies*. 2016;37(3-4):341:403.
- 10 Stoye G, Zaranko B, Shipley M, McKee M, Brunner EJ. Educational Inequalities in Hospital Use Among Older Adults in England, 2004-2015. *Milbank Quarterly*. 2020;98(4):1134-1170.
- 11 Fisher R, Allen L, Malhotra AM, Alderwick H. Tackling the inverse care law: analysis of policies to improve general practice in deprived areas since 1990. London: Health Foundation. 2022. <https://www.health.org.uk/publications/reports/tackling-the-inverse-care-law>
- 12 NHS England. Integrated care systems: design framework. 2021. <https://www.england.nhs.uk/wp-content/uploads/2021/06/B0642-ics-design-framework-june-2021.pdf>
- 13 Hill Dickinson, The Strategy Unit. Briefing note for integrated care boards on legal duties in respect of reducing inequalities. 2022. <https://www.midlandsdecisionsupport.nhs.uk/wp-content/uploads/2022/08/Briefing-note-for-Integrated-Care-Boards.pdf>
- 14 NHS England. 2021/22 priorities and operational planning guidance: implementation guidance. 2021. <https://www.england.nhs.uk/wp-content/uploads/2021/03/B0468-implementation-guidance-21-22-priorities-and-operational-planning-guidance.pdf>
- 15 NHS England. Core20PLUS5 (adults): an approach to reducing healthcare inequalities. <https://www.england.nhs.uk/about/equality/equality-hub/national-healthcare-inequalities-improvement-programme/core20plus5/>
- 16 NHS England. 2023/24 priorities and operational planning guidance. 2023. <https://www.england.nhs.uk/wp-content/uploads/2022/12/PRN00021-23-24-priorities-and-operational-planning-guidance-v1.1.pdf>
- 17 Barnes M, Bauld M, Benzeval M, Mackenzie M, Sullivan H, Judge K. Health action zones: partnerships for health equity. 2005. Abingdon, New York: Routledge.
- 18 National Evaluation of Health Action Zones. Health Action Zones: Learning to make a difference. Findings from a preliminary review of Health Action Zones and proposals for a national evaluation. 1999. <https://www.pssru.ac.uk/pub/dp1546.pdf>
- 19 Bate A, Foster D. Sure Start (England). House of Commons Library. 2017. <https://researchbriefings.files.parliament.uk/documents/CBP-7257/CBP-7257.pdf>
- 20 Belsky J, Melhuish E, Barnes J. Research and policy in developing an early years' initiative: the case of sure start. *International Journal of Child Care and Education Policy*. 2008;2:1-13. <https://link.springer.com/article/10.1007/2288-6729-2-2-1>
- 21 Department of the Environment, Transport and the Regions. Local Strategic Partnerships: government guidance summary. 2001.

- 1  
2  
3  
4 [https://webarchive.nationalarchives.gov.uk/ukgwa/20010815042253/http://www.local-](https://webarchive.nationalarchives.gov.uk/ukgwa/20010815042253/http://www.local-regions.detr.gov.uk:80/lsp/guidance/index.htm)  
5 [regions.detr.gov.uk:80/lsp/guidance/index.htm](https://webarchive.nationalarchives.gov.uk/ukgwa/20010815042253/http://www.local-regions.detr.gov.uk:80/lsp/guidance/index.htm)  
6 22 Geddes M, Davis J, Fuller C. Evaluating local strategic partnerships: theory and practice of  
7 change. *Local Government Studies*. 2007;33(1):97-116.  
8 23 Department of Health. Reducing health inequalities: an action report. London: Department of  
9 Health; 1999.  
10 24 HM Treasury, Department of Health. Tackling health inequalities: summary of the 2002 cross-  
11 cutting review. London: Department of Health; 2002.  
12 25 Department of Health. Tackling health inequalities: a programme for action. London: Department  
13 of Health; 2003.  
14 26 NHS England. The NHS long term plan. 2019. [https://www.longtermplan.nhs.uk/wp-](https://www.longtermplan.nhs.uk/wp-content/uploads/2019/08/nhs-long-term-plan-version-1.2.pdf)  
15 [content/uploads/2019/08/nhs-long-term-plan-version-1.2.pdf](https://www.longtermplan.nhs.uk/wp-content/uploads/2019/08/nhs-long-term-plan-version-1.2.pdf)  
16 27 NHS England. NHS long term plan implementation framework. 2019.  
17 [https://www.longtermplan.nhs.uk/wp-content/uploads/2019/06/long-term-plan-implementation-](https://www.longtermplan.nhs.uk/wp-content/uploads/2019/06/long-term-plan-implementation-framework-v1.pdf)  
18 [framework-v1.pdf](https://www.longtermplan.nhs.uk/wp-content/uploads/2019/06/long-term-plan-implementation-framework-v1.pdf)  
19 28 Graham H, Kelly M. Health inequalities: Concepts, frameworks and policy. Health Development  
20 Agency. 2004.  
21 [https://elevateni.org/app/uploads/2022/01/Health\\_Inequalities\\_Concepts\\_Frameworks\\_and\\_Policy.pd](https://elevateni.org/app/uploads/2022/01/Health_Inequalities_Concepts_Frameworks_and_Policy.pdf)  
22 [f](https://elevateni.org/app/uploads/2022/01/Health_Inequalities_Concepts_Frameworks_and_Policy.pdf)  
23 29 Exworthy M, Powell M. Big windows and little windows: implementation in the congested state.  
24 *Public Administration*. 2004;82(2):263-281.  
25 30 Olivera JN, Ford J, Sowden S, Bamba C. Conceptualisation of health inequalities by local  
26 healthcare systems: A document analysis. *Health Soc Care Community*. 2022;30(6):e3977-e3984.  
27 31 Ford J, Sowden S, Olivera J, Bamba C, Gimson A, Aldridge R, Brayne C. Transforming health  
28 systems to reduce health inequalities. *Future Healthc J*. 2021 Jul;8(2):e204-e209.  
29 32 McMahon NE. What shapes local health system actors' thinking and action on social inequalities in  
30 health? A meta-ethnography. *Soc Theory Health*. 2023;21(2):119-139.  
31 33 Alderwick H, Gottlieb LM. Meanings and Misunderstandings: A Social Determinants of Health  
32 Lexicon for Health Care Systems. *Milbank Q*. 2019;97(2):407-419.  
33 34 Olivera JN, Ford J, Sowden S, Bamba C. Conceptualisation of health inequalities by local  
34 healthcare systems: A document analysis. *Health Soc Care Community*. 2022;30(6):e3977-e3984.  
35 35 Briggs, ADM, Göpfert A, Thorlby R, Allwood D, Alderwick, H. Integrated health and care  
36 systems in England: can they help prevent disease? *Integrated Healthcare Journal*, 2;e000013.  
37 doi:10.1136/ihj-2019-000013 ISSN 2399-5351.  
38 36 Exworthy M, Blane D, Marmot M. Tackling health inequalities in the United Kingdom: the  
39 progress and pitfalls of policy. *Health Serv Res*. 2003 Dec;38(6 Pt 2):1905-21.  
40 37 Finch D, Vriend M. Public health grant: what it is and why greater investment is needed. 2023.  
41 [https://www.health.org.uk/news-and-comment/charts-and-infographics/public-health-grant-what-it-is-](https://www.health.org.uk/news-and-comment/charts-and-infographics/public-health-grant-what-it-is-and-why-greater-investment-is-needed)  
42 [and-why-greater-investment-is-needed](https://www.health.org.uk/news-and-comment/charts-and-infographics/public-health-grant-what-it-is-and-why-greater-investment-is-needed)  
43 38 Exworthy M, Berney L, Powell M. 'How great expectations in Westminster may be dashed  
44 locally': the local implementation of national policy on health inequalities. *Policy & Politics*.  
45 2002;30(1):79-96.  
46 39 Lewis RQ, Checkland K, Durand MA, Ling T, Mays N, Roland M, Smith JA. Integrated Care in  
47 England: what can we Learn from a Decade of National Pilot Programmes? *Int J Integr Care*.  
48 2021;21(4):5.  
49 40 Rochefort DA, Cobb RW (eds). The politics of problem definition: shaping the policy agenda.  
50 University Press of Kansas; 1994.  
51 41 Head BW. Wicked problems in public policy: understanding and responding to complex  
52 challenged. Palgrave Macmillan;2022. <https://doi.org/10.1007/978-3-030-94580-0>  
53 42 Koon AD, Hawkins B, Mayhew SH. Framing and the health policy process: a scoping review.  
54 *Health Policy Plan*. 2016 Jul;31(6):801-16.  
55 43 Fischer, Frank. Reframing Public Policy: Discursive Politics and Deliberative Practices. Oxford:  
56 Oxford University Press; 2003.  
57  
58  
59  
60



- 44 Blackman T, Harrington B, Elliott E, Greene A, Hunter DJ, Marks L, McKee L, Williams G. Framing health inequalities for local intervention: comparative case studies. *Sociol Health Illn*. 2012;34(1):49-63.
- 45 Blackman, T, Elliott, E, Greene, A, Harrington, B, Hunter, D, Marks, L, McKee, L, Williams, G & Smith, K. 'Tackling health inequalities in post-devolution Britain: Do targets matter?', *Public Administration*. 2009;87(4):762-778.
- 46 Exworthy M, Morcillo V. Primary care doctors' understandings of and strategies to tackle health inequalities: a qualitative study. *Prim Health Care Res Dev*. 2019 May 21;20:e20.
- 47 Babbel B, Mackenzie M, Hastings A, Watt G. How do general practitioners understand health inequalities and do their professional roles offer scope for mitigation? Constructions derived from the deep end of primary care. *Critical Public Health*. 2017;29(2):1-13.
- 48 Pauly BM, Shahram SZ, Dang PTH, Marcellus L, MacDonald M. Health Equity Talk: Understandings of Health Equity among Health Leaders. *AIMS Public Health*. 2017 Nov 15;4(5):490-512.
- 49 Warwick-Giles L, Coleman A, Checkland K. Making Sense of Inequalities: How Do Clinical Commissioning Groups in England Understand their New Role? *Social Policy and Administration*. 2016. 51(7):1231-1247.
- 50 Mead R, Thurston M, Bloyce D. From public issues to personal troubles: Individualising social inequalities in health within local public health partnerships. *Critical Public Health*. 2020 doi: 10.1080/09581596.2020.1763916.
- 51 Ham H, Alderwick H, Dunn P, McKenna H. Delivering sustainability and transformation plans: from ambitious proposals to credible plans. London: King's Fund; 2017.
- 52 Moran V, Allen P, Sanderson M, McDermott I, Osipovic D. Challenges of maintaining accountability in networks of health and care organisations: A study of developing Sustainability and Transformation Partnerships in the English National Health Service. *Soc Sci Med*. 2021;268:113512.
- 53 Sanderson M, Allen P, Osipovic D, et al. Developing architecture of system management in the English NHS: evidence from a qualitative study of three Integrated Care Systems. *BMJ Open* 2023;13:e065993.
- 54 Sanderson M, Allen P, Osipovic D, et al. The Developing Architecture of System Management: Integrated Care Systems and Sustainability and Transformation Partnerships. 2022. <https://prucomm.ac.uk/assets/uploads/The%20Developing%20Architecture%20of%20System%20Management%20Integrated%20Care.pdf>
- 55 Alderwick H, Dunn P, McKenna H, Walsh N, Ham C. Sustainability and transformation plans in the NHS: how are they being developed in practice? London: King's Fund. 2016.
- 56 Alderwick, H., Hutchings, A., Briggs, A. et al. The impacts of collaboration between local health care and non-health care organizations and factors shaping how they work: a systematic review of reviews. *BMC Public Health*. 2021;21,753.
- 57 NHS England. Establishing integrated care systems by April 2021. [https://www.england.nhs.uk/wp-content/uploads/2019/03/07\\_MiCIE\\_PB\\_28\\_03\\_2019-Establishing-ICSs-by-April-2021.pdf](https://www.england.nhs.uk/wp-content/uploads/2019/03/07_MiCIE_PB_28_03_2019-Establishing-ICSs-by-April-2021.pdf)
- 58 Patton MQ. Qualitative research and evaluation methods. 3rd ed. Thousand Oaks (CA): Sage Publications; 2002.
- 59 Charles A. Integrated care systems explained. King's Fund. 2022. <https://www.kingsfund.org.uk/publications/integrated-care-systems-explained>
- 60 Bradley EH, Curry LA, Devers KJ. Qualitative data analysis for health services research: developing taxonomy, themes, and theory. *Health Serv Res*. 2007;42(4):1758-72.
- 61 Nilsen P, Ståhl C, Roback K, Cairney P. Never the twain shall meet? A comparison of implementation science and policy implementation research. *Implement Sci*. 2013;10;8:63.
- 62 Schofield J. Time for a revival? Public policy implementation: a review of the literature and an agenda for future research. *International Journal of Management Reviews*. 2001;3:245-263.
- 63 Sausman C, Oborn E, Barrett M. Policy translation through localisation: implementing national policy in the UK. *Policy & Politics*. 2016;44(4):563-589.

- 1  
2  
3  
4  
5  
6  
7  
8  
9  
10  
11  
12  
13  
14  
15  
16  
17  
18  
19  
20  
21  
22  
23  
24  
25  
26  
27  
28  
29  
30  
31  
32  
33  
34  
35  
36  
37  
38  
39  
40  
41  
42  
43  
44  
45  
46  
47  
48  
49  
50  
51  
52  
53  
54  
55  
56  
57  
58  
59  
60
- 
- 64 Alderwick H, Gottlieb L. Meanings and misunderstandings: a social determinants of health lexicon for health care systems. *Milbank Q.* 2019; 97(2): 407–419.
- 65 Holdroyd I, Vodden A, Srinivasan A, Kuhn I, Bambra C, Ford JA. Systematic review of the effectiveness of the health inequalities strategy in England between 1999 and 2010. *BMJ Open* 2022;12:e063137.
- 66 Vodden A, Holdroyd I, Bentley C, et al. Evaluation of the national governmental efforts between 1997 and 2010 in reducing health inequalities in England. *Public Health* 2023;218:128-35.
- 67 Thimm-Kaiser M, Benzekri A, Guilamo-Ramos V. Conceptualizing the Mechanisms of Social Determinants of Health: A Heuristic Framework to Inform Future Directions for Mitigation. *The Milbank Quarterly.* 2023; 101(2):486-526. doi: <https://doi.org/10.1111/1468-0009.12642>
- 68 Solar O, Irwin A. A Conceptual Framework for Action on the Social Determinants of Health: Social Determinants of Health Discussion Paper 2. World Health Organization; 2010. <https://iris.who.int/handle/10665/44489>
- 69 Buzelli L, Dunn P, Scott S, Gottlieb L, Alderwick H. A framework for NHS action on social determinants of health. Health Foundation. 2022. <https://www.health.org.uk/publications/long-reads/a-framework-for-nhs-action-on-social-determinants-of-health>
- 70 Fisher R, Allen L, Malhotra AM, Alderwick H. Tackling the inverse care law: Analysis of policies to improve general practice in deprived areas since 1990. London: Health Foundation. 2022.
- 71 Gadsby EW, Peckham S, Coleman A, et al. Commissioning for health improvement following the 2012 health and social care reforms in England: what has changed?. *BMC Public Health.* 2017;17:211.
- 72 UK Government. Health and Social Care Act 2012. <https://www.legislation.gov.uk/ukpga/2012/7/contents/enacted>
- 73 Alderwick H, Dunn P, Gardner T, Mays N, Dixon J. Will a new NHS structure in England help recovery from the pandemic? *BMJ.* 2021;372:n248.
- 74 Lantz PM, Goldberg DS, Gollust SE. The Perils of Medicalization for Population Health and Health Equity. *Milbank Q.* 2023;101(S1):61-82.
- 75 Nuffield Trust. NHS performance tracker. <https://www.nuffieldtrust.org.uk/qualitywatch/nhs-performance-summary>
- 76 Lewis RQ, Checkland K, Durand MA, et al. Integrated Care in England – what can we Learn from a Decade of National Pilot Programmes? *International Journal of Integrated Care.* 2021;21:5. doi: 10.5334/ijic.5631
- 77 Alderwick H, Dunn P, McKenna H, et al. Sustainability and transformation plans in the NHS: how are they being developed in practice? London: King’s Fund. 2016.
- 78 Mannion R, Braithwaite J. Unintended consequences of performance measurement in healthcare: 20 salutary lessons from the English National Health Service. *Intern Med J.* 2012;42(5):569-74.

## Standards for Reporting Qualitative Research (SRQR)\*

<http://www.equator-network.org/reporting-guidelines/srqr/>

Page/line no(s).

### Title and abstract

|                                                                                                                                                                                                                                                              |                    |
|--------------------------------------------------------------------------------------------------------------------------------------------------------------------------------------------------------------------------------------------------------------|--------------------|
| <p><b>Title</b> - Concise description of the nature and topic of the study Identifying the study as qualitative or indicating the approach (e.g., ethnography, grounded theory) or data collection methods (e.g., interview, focus group) is recommended</p> | Page 2, lines 1-3  |
| <p><b>Abstract</b> - Summary of key elements of the study using the abstract format of the intended publication; typically includes background, purpose, methods, results, and conclusions</p>                                                               | Page 2, lines 4-26 |

### Introduction

|                                                                                                                                                                     |                        |
|---------------------------------------------------------------------------------------------------------------------------------------------------------------------|------------------------|
| <p><b>Problem formulation</b> - Description and significance of the problem/phenomenon studied; review of relevant theory and empirical work; problem statement</p> | Pages 2-3, lines 39-87 |
| <p><b>Purpose or research question</b> - Purpose of the study and specific objectives or questions</p>                                                              | Page 3, lines 83-87    |

### Methods

|                                                                                                                                                                                                                                                                                                                                                                                                             |                         |
|-------------------------------------------------------------------------------------------------------------------------------------------------------------------------------------------------------------------------------------------------------------------------------------------------------------------------------------------------------------------------------------------------------------|-------------------------|
| <p><b>Qualitative approach and research paradigm</b> - Qualitative approach (e.g., ethnography, grounded theory, case study, phenomenology, narrative research) and guiding theory if appropriate; identifying the research paradigm (e.g., postpositivist, constructivist/ interpretivist) is also recommended; rationale**</p>                                                                            | Pages 3-4, lines 88-142 |
| <p><b>Researcher characteristics and reflexivity</b> - Researchers' characteristics that may influence the research, including personal attributes, qualifications/experience, relationship with participants, assumptions, and/or presuppositions; potential or actual interaction between researchers' characteristics and the research questions, approach, methods, results, and/or transferability</p> | Page 10, lines 446-453  |
| <p><b>Context</b> - Setting/site and salient contextual factors; rationale**</p>                                                                                                                                                                                                                                                                                                                            | Pages 3-4, lines 93-129 |
| <p><b>Sampling strategy</b> - How and why research participants, documents, or events were selected; criteria for deciding when no further sampling was necessary (e.g., sampling saturation); rationale**</p>                                                                                                                                                                                              | Pages 3-4, lines 93-122 |
| <p><b>Ethical issues pertaining to human subjects</b> - Documentation of approval by an appropriate ethics review board and participant consent, or explanation for lack thereof; other confidentiality and data security issues</p>                                                                                                                                                                        | Page 10, lines 456-460  |
| <p><b>Data collection methods</b> - Types of data collected; details of data collection procedures including (as appropriate) start and stop dates of data collection and analysis, iterative process, triangulation of sources/methods, and modification of procedures in response to evolving study findings; rationale**</p>                                                                             | Page 4, lines 130-142   |

|                       |                                                                                                                                                                                                                                                       |                       |
|-----------------------|-------------------------------------------------------------------------------------------------------------------------------------------------------------------------------------------------------------------------------------------------------|-----------------------|
| 1<br>2<br>3<br>4<br>5 | <b>Data collection instruments and technologies</b> - Description of instruments (e.g., interview guides, questionnaires) and devices (e.g., audio recorders) used for data collection; if/how the instrument(s) changed over the course of the study | Page 4, lines 130-142 |
| 6<br>7<br>8           | <b>Units of study</b> - Number and relevant characteristics of participants, documents, or events included in the study; level of participation (could be reported in results)                                                                        | Page 4, lines 120-122 |
| 9<br>10<br>11<br>12   | <b>Data processing</b> - Methods for processing data prior to and during analysis, including transcription, data entry, data management and security, verification of data integrity, data coding, and anonymization/de-identification of excerpts    | Page 4, lines 130-142 |
| 13<br>14<br>15<br>16  | <b>Data analysis</b> - Process by which inferences, themes, etc., were identified and developed, including the researchers involved in data analysis; usually references a specific paradigm or approach; rationale**                                 | Page 4, lines 130-142 |
| 17<br>18<br>19<br>20  | <b>Techniques to enhance trustworthiness</b> - Techniques to enhance trustworthiness and credibility of data analysis (e.g., member checking, audit trail, triangulation); rationale**                                                                | Page 4, lines 135-142 |

## Results/findings

|                            |                                                                                                                                                                                                   |                                                           |
|----------------------------|---------------------------------------------------------------------------------------------------------------------------------------------------------------------------------------------------|-----------------------------------------------------------|
| 23<br>24<br>25<br>26       | <b>Synthesis and interpretation</b> - Main findings (e.g., interpretations, inferences, and themes); might include development of a theory or model, or integration with prior research or theory | Pages 4-8, lines 145-338                                  |
| 27<br>28<br>29<br>30<br>31 | <b>Links to empirical data</b> - Evidence (e.g., quotes, field notes, text excerpts, photographs) to substantiate analytic findings                                                               | Pages 4-8, lines 145-338 (quotes and excerpts throughout) |

## Discussion

|                                        |                                                                                                                                                                                                                                                                                                                                                                                                             |                           |
|----------------------------------------|-------------------------------------------------------------------------------------------------------------------------------------------------------------------------------------------------------------------------------------------------------------------------------------------------------------------------------------------------------------------------------------------------------------|---------------------------|
| 34<br>35<br>36<br>37<br>38<br>39<br>40 | <b>Integration with prior work, implications, transferability, and contribution(s) to the field</b> - Short summary of main findings; explanation of how findings and conclusions connect to, support, elaborate on, or challenge conclusions of earlier scholarship; discussion of scope of application/generalizability; identification of unique contribution(s) to scholarship in a discipline or field | Pages 8-9, lines 339-410  |
| 41<br>42                               | <b>Limitations</b> - Trustworthiness and limitations of findings                                                                                                                                                                                                                                                                                                                                            | Pages 9-10, lines 411-430 |

## Other

|                |                                                                                                                                               |                        |
|----------------|-----------------------------------------------------------------------------------------------------------------------------------------------|------------------------|
| 45<br>46<br>47 | <b>Conflicts of interest</b> - Potential sources of influence or perceived influence on study conduct and conclusions; how these were managed | Page 10, lines 456-457 |
| 48<br>49       | <b>Funding</b> - Sources of funding and other support; role of funders in data collection, interpretation, and reporting                      | Page 10, lines 444-447 |

\*The authors created the SRQR by searching the literature to identify guidelines, reporting standards, and critical appraisal criteria for qualitative research; reviewing the reference lists of retrieved sources; and contacting experts to gain feedback. The SRQR aims to improve the transparency of all aspects of qualitative research by providing clear standards for reporting qualitative research.

1  
2  
3  
4  
5  
6  
7  
8  
9  
10  
11  
12  
13  
14  
15  
16  
17  
18  
19  
20  
21  
22  
23  
24  
25  
26  
27  
28  
29  
30  
31  
32  
33  
34  
35  
36  
37  
38  
39  
40  
41  
42  
43  
44  
45  
46  
47  
48  
49  
50  
51  
52  
53  
54  
55  
56  
57  
58  
59  
60

\*\*The rationale should briefly discuss the justification for choosing that theory, approach, method, or technique rather than other options available, the assumptions and limitations implicit in those choices, and how those choices influence study conclusions and transferability. As appropriate, the rationale for several items might be discussed together.

**Reference:**

O'Brien BC, Harris IB, Beckman TJ, Reed DA, Cook DA. **Standards for reporting qualitative research: a synthesis of recommendations.** *Academic Medicine*, Vol. 89, No. 9 / Sept 2014  
DOI: 10.1097/ACM.0000000000000388

For peer review only

# BMJ Open

**Solving poverty or tackling health care inequalities?  
Qualitative study exploring local interpretations of national  
policy on health inequalities under new NHS reforms in  
England**

|                                    |                                                                                                                                                                                                                                                |
|------------------------------------|------------------------------------------------------------------------------------------------------------------------------------------------------------------------------------------------------------------------------------------------|
| Journal:                           | <i>BMJ Open</i>                                                                                                                                                                                                                                |
| Manuscript ID                      | bmjopen-2023-081954.R1                                                                                                                                                                                                                         |
| Article Type:                      | Original research                                                                                                                                                                                                                              |
| Date Submitted by the Author:      | 09-Feb-2024                                                                                                                                                                                                                                    |
| Complete List of Authors:          | Alderwick, Hugh; Health Foundation, London ,<br>Hutchings, Andrew; London School of Hygiene and Tropical Medicine<br>Mays, Nicholas; London School of Hygiene and Tropical Medicine, Public<br>Health and Policy                               |
| <b>Primary Subject<br>Heading</b>: | Health policy                                                                                                                                                                                                                                  |
| Secondary Subject Heading:         | Public health, Qualitative research                                                                                                                                                                                                            |
| Keywords:                          | Health policy < HEALTH SERVICES ADMINISTRATION & MANAGEMENT,<br>Public health < INFECTIOUS DISEASES, Organisation of health services<br>< HEALTH SERVICES ADMINISTRATION & MANAGEMENT, Health Equity,<br>Health Services, QUALITATIVE RESEARCH |
|                                    |                                                                                                                                                                                                                                                |

SCHOLARONE™  
Manuscripts



I, the Submitting Author has the right to grant and does grant on behalf of all authors of the Work (as defined in the below author licence), an exclusive licence and/or a non-exclusive licence for contributions from authors who are: i) UK Crown employees; ii) where BMJ has agreed a CC-BY licence shall apply, and/or iii) in accordance with the terms applicable for US Federal Government officers or employees acting as part of their official duties; on a worldwide, perpetual, irrevocable, royalty-free basis to BMJ Publishing Group Ltd ("BMJ") its licensees and where the relevant Journal is co-owned by BMJ to the co-owners of the Journal, to publish the Work in this journal and any other BMJ products and to exploit all rights, as set out in our [licence](#).

The Submitting Author accepts and understands that any supply made under these terms is made by BMJ to the Submitting Author unless you are acting as an employee on behalf of your employer or a postgraduate student of an affiliated institution which is paying any applicable article publishing charge ("APC") for Open Access articles. Where the Submitting Author wishes to make the Work available on an Open Access basis (and intends to pay the relevant APC), the terms of reuse of such Open Access shall be governed by a Creative Commons licence – details of these licences and which [Creative Commons](#) licence will apply to this Work are set out in our licence referred to above.

Other than as permitted in any relevant BMJ Author's Self Archiving Policies, I confirm this Work has not been accepted for publication elsewhere, is not being considered for publication elsewhere and does not duplicate material already published. I confirm all authors consent to publication of this Work and authorise the granting of this licence.

**TITLE**

*Solving poverty or tackling health care inequalities? Qualitative study exploring local interpretations of national policy on health inequalities under new NHS reforms in England*

**Authors**

Hugh Alderwick (corresponding author), Health Foundation,<sup>[i]</sup> London School of Hygiene and Tropical Medicine<sup>[ii]</sup> ([Hugh.Alderwick@health.org.uk](mailto:Hugh.Alderwick@health.org.uk))

Andrew Hutchings, London School of Hygiene and Tropical Medicine<sup>[ii]</sup>  
([Andrew.Hutchings@lshtm.ac.uk](mailto:Andrew.Hutchings@lshtm.ac.uk))

Nicholas Mays, London School of Hygiene and Tropical Medicine<sup>[ii]</sup> ([Nicholas.Mays@lshtm.ac.uk](mailto:Nicholas.Mays@lshtm.ac.uk))

**Word count:** 5,560

**Figures and tables:** 0

For peer review only

---

<sup>i</sup> Health Foundation, 8 Salisbury Square, London, EC4Y 8AP, UK

<sup>ii</sup> London School of Hygiene and Tropical Medicine, 15-17 Tavistock Place, London, WC1H 9SH, UK



1  
2  
3 **1 TITLE**

4 *2 Solving poverty or tackling health care inequalities? Qualitative study exploring local interpretations*  
5 *3 of national policy on health inequalities under new NHS reforms in England*

6  
7 **4 ABSTRACT**

8  
9 **5 Objectives.** Major reforms to the organization of the NHS in England established 42 integrated care  
10 6 systems (ICSs) to plan and coordinate local services. The changes are based on the idea that cross-  
11 7 sector collaboration is needed to improve health and reduce health inequalities—and similar policy  
12 8 changes are happening elsewhere in the UK and internationally. We explored local interpretations of  
13 9 national policy objectives on reducing health inequalities among senior leaders working in three ICSs.

14  
15 **10 Design.** We carried out qualitative research based on semi-structured interviews with NHS, public  
16 11 health, social care, and other leaders in three ICSs in England.

17  
18 **12 Setting and participants.** We selected three ICSs with varied characteristics all experiencing high  
19 13 levels of socioeconomic deprivation. We conducted 32 in-depth interviews with senior leaders of  
20 14 NHS, local government, and other organizations involved in the ICS's work on health inequalities.  
21 15 Our interviewees comprised 17 leaders from NHS organizations and 15 leaders from other sectors.

22  
23 **16 Results.** Local interpretations of national policy objectives on health inequalities varied, and local  
24 17 leaders had contrasting—sometimes conflicting—perceptions of the boundaries of ICS action on  
25 18 reducing health inequalities. Translating national objectives into local priorities was often a challenge,  
26 19 and clarity from national policymakers was frequently perceived as limited or lacking. Across the  
27 20 three ICSs, local leaders worried that objectives on tackling health inequalities were being crowded  
28 21 out by other short-term policy priorities, such as reducing pressures on NHS hospitals. The behaviour  
29 22 of national policymakers appeared to undermine their stated priorities to reduce health inequalities.

30  
31 **23 Conclusions.** Varied and vague interpretations of NHS policy on health inequalities are not new, but  
32 24 lack of clarity among local health leaders brings major risks—including interventions being poorly  
33 25 targeted or inadvertently widening inequalities. Greater conceptual clarity is likely needed to guide  
34 26 ICS action in future.

35  
36  
37 **28 Strengths and limitations of this study**

- 38  
39 - This is a qualitative study providing in-depth insights from senior leaders in England's new  
40 30 ICSs—including leaders from NHS, local government, and other community-based organizations.  
41 31 - Our structured sampling approach meant we were able to carry out interviews in three ICSs with  
42 32 varied characteristics all experiencing high levels of socioeconomic deprivation.  
43 33 - Our findings represent specific experiences of leaders in three areas of England where reducing  
44 34 inequalities may be high on the agenda, rather than general experiences of ICSs nationally.  
45 35 - We carried out our fieldwork soon after the reforms, so our research represents leaders' initial  
46 36 interpretations of ICS policy objectives on health inequalities, which are likely to evolve.

47  
48  
49 **38 INTRODUCTION**

50  
51 The Health and Care Act 2022 introduced major changes to the rules and structures of the NHS in  
52 40 England, undoing components of the market-based reforms introduced by the Coalition government a  
53 41 decade earlier.[1,2] The changes are based on the idea that cross-sector collaboration is needed to  
54 42 improve health and reduce health inequalities. Since July 2022, 42 integrated care systems (ICSs)—  
55 43 area-based partnerships between the NHS, social care, public health, and other services in England—  
56 44 have been responsible for planning and coordinating health and care services for populations of  
57 45 around 500,000 to 3 million people.[3] Each ICSs is made up of a new NHS body and wider  
58 46 committee of NHS, local government, and other agencies. The reforms build on a long history of  
59 47 policies on cross-sector collaboration on health,[4] and echo policy changes across the UK and in  
60 48 other countries.[5,6]

1  
2  
3 49 ICSs have been given explicit objectives by national policymakers to reduce health inequalities. Gaps  
4 50 in life expectancy between the most and least socially disadvantaged groups in England are wide and  
5 51 growing,[7,8] and there are inequalities in access to high quality health care.[9,10,11] One of the four  
6 52 'core purposes' of ICSs—defined by NHS England, the national body responsible for the day-to-day  
7 53 running of the English NHS—is to 'tackle inequalities in outcomes, experience, and access'.[12] NHS  
8 54 bodies and new ICSs have various legal duties on health inequalities: some broad (such as to consider  
9 55 the effects of their decisions on inequalities in population health and wellbeing), some more specific  
10 56 (such as to reduce inequalities in access to health services).[1,13] NHS England has also produced  
11 57 broad guidance for ICSs on reducing inequalities, setting out priorities for 'recovering' services  
12 58 affected by covid-19[14] and target groups for action on health care inequalities (including the 20%  
13 59 most deprived of the population and people with selected clinical conditions—an approach known as  
14 60 core20plus5).[15] Modest additional funding (£200m nationally in 2022-23) has been provided to  
15 61 support these efforts.[16]

17  
18 62 ICSs are the latest in a long line of local partnerships tasked with delivering national policy objectives  
19 63 on health inequalities.[4] For example, a mix of area-based partnerships between the NHS, local  
20 64 government, and other agencies was established to improve health and reduce health inequalities  
21 65 under Labour governments from 1997 to 2010—including Health Action Zones,[17,18] Sure Start  
22 66 Local Programmes,[19,20] Local Strategic Partnerships,[21,22] and more—as part of a broader  
23 67 national strategy to reduce gaps in life expectancy and infant mortality between richer and poorer  
24 68 areas in England.[23,24,25] More recently, the NHS Long Term Plan in 2019 committed to stronger  
25 69 NHS action on health inequalities,[26] and partnerships between the NHS, local government, and  
26 70 community-based organizations—early versions of ICSs—were asked to develop local plans for how  
27 71 to do it.[27]

28  
29 72 But translating national policy into local action is not easy. Health inequalities are complex[28] and  
30 73 policy objectives to reduce them are often ambiguous, partial, and shifting.[29,30,31] Health leaders  
31 74 have competing interpretations of the problem to be solved—for instance, between 'individualized'  
32 75 and broader structural interpretations of inequalities.[32,33] And local plans for action on health  
33 76 inequalities are often vague.[30,34,18] Even then, policy objectives to tackle health inequalities are  
34 77 rarely matched with the resources needed to achieve them,[35,36] and are repeatedly drowned out by  
35 78 higher profile and short-term political priorities, like reducing NHS waiting times or balancing  
36 79 hospital budgets.[37,38] Alongside reducing health inequalities, England's new ICSs are expected to  
37 80 deliver a mix of other national policy objectives, such as increasing NHS productivity, as well as  
38 81 meeting targets to improve access to urgent and emergency care and reduce long waiting times for  
39 82 routine hospital treatment.[12,16]

40  
41 83 How policy problems are framed and understood shapes action to address them.[39,40,41,42]  
42 84 Competing problem definitions interact and evolve.[39,40] And lack of clarity on aims and objectives  
43 85 can hold back collaboration between local agencies expected to work together to deliver them.[4]  
44 86 Previous studies have examined how past national policies on health inequalities in England have  
45 87 been interpreted by local leaders,[37,29,43,44] as well as individual and organizational perspectives  
46 88 on health inequalities in the UK and elsewhere.[32,45,46,47,48,49] More recently, researchers have  
47 89 analysed how health inequalities are conceptualized in local health planning documents[30,34,50] and  
48 90 tracked the early development of ICSs in England.[51,52,53,54] But in-depth understanding of how  
49 91 England's new ICSs are interpreting national policy on health inequalities is limited. We conducted  
50 92 qualitative research with NHS, public health, social care, and other leaders in three more  
51 93 socioeconomically deprived ICSs to gain insight into local interpretations of national health  
52 94 inequalities objectives, how inequalities relate to other priorities, and how these interpretations vary.

## 95 **METHODS**

### 96 **Design and sample**

97 We used qualitative methods to explore local interpretations of national policy objectives on health  
98 99 inequalities among senior leaders involved in England's new ICSs. Our sample comprised 32 leaders  
from NHS, social care, public health, and community-based organizations in three ICS areas.

1  
2  
3 100 We identified a purposive sample of ICSs with varied characteristics experiencing high levels of  
4 101 socioeconomic deprivation. We collated a mix of publicly available data on the characteristics of each  
5 102 of England's 42 ICSs[3]—including geographical context (NHS region and proportion of rural/urban  
6 103 areas), population size, organizational complexity (number of NHS trusts and upper tier local  
7 104 authorities), policy context (number of sites involved in relevant policy initiatives in the ICS, and the  
8 105 date the early version of the ICS was established), and socioeconomic deprivation (proportion of the  
9 106 ICSs' lower super output areas (LSOAs) in the most deprived 20% of areas nationally, using index of  
10 107 multiple deprivation (IMD) ranks). We selected these characteristics because of evidence on their  
11 108 likely relevance to how organizations in ICSs work together to reduce health inequalities.[55,3]

12  
13 109 We used these data to identify a sub-group of 14 ICSs experiencing the highest concentration of  
14 110 socioeconomic deprivation relative to other ICSs in England (the top tercile of ICSs with the highest  
15 111 concentration of LSOAs in most deprived 20% of areas nationally). National NHS bodies are seeking  
16 112 to reduce health inequalities by targeting efforts on the most deprived groups[15]—and areas with  
17 113 similar levels of socioeconomic deprivation may pursue common approaches. The experiences of  
18 114 ICSs in these areas are therefore likely to be particularly relevant to understand and inform policy in  
19 115 England. We then identified three ICSs within this sub-group that varied in population size (which is  
20 116 strongly correlated with organizational complexity), geographical region, rurality, and policy  
21 117 context—for example, by avoiding selecting all three sites from an early 'wave' of NHS England's  
22 118 ICS programme (NHS England established early ICSs in waves based on perceived 'maturity'[56] of  
23 119 local partnerships). This gave us a relatively heterogenous mix of three ICSs all serving more  
24 120 socioeconomically deprived populations. ICS leaders from the three areas we selected all agreed to  
25 121 participate in the research. ICS A is a large system covering a mixed rural/urban area; ICS B is a  
26 122 medium size system covering a more urban area; ICS C is a large system covering a more urban area.

27  
28  
29 123 In each ICS, we conducted in-depth interviews with senior leaders of NHS, local government, and  
30 124 other organizations involved in the ICS's work on health inequalities. This included leaders from  
31 125 NHS integrated care boards (ICBs) (such as ICB chief executives and directors of strategy), NHS  
32 126 providers (such as NHS Trust chief executives and GPs), local authorities (such as directors of public  
33 127 health and adult social care), and other community-based organizations (such as leaders of charities  
34 128 working with the ICS to represent the public or provide services)—as well as those involved in the  
35 129 day-to-day management of ICS work on health inequalities. Participants were identified through web-  
36 130 based research and snowball sampling.[57] Our sample comprised 17 leaders from NHS organizations  
37 131 (including those working within the ICB) and 15 from local government or other organizations  
38 132 outside the NHS. We describe all research participants as 'leaders' when reporting the results.

39  
40 133 ICSs are complex systems involving a mix of organizations and partnerships between them. ICSs  
41 134 themselves are made up of two bodies: ICBs (area-based NHS agencies responsible for controlling  
42 135 most NHS resources to improve health and care for their local population) and integrated care  
43 136 partnerships (looser collaborations between NHS, local government, and other agencies, responsible  
44 137 for developing an integrated care plan to guide local decisions—including those of the ICB). ICSs are  
45 138 expected to deliver their objectives through the work of both bodies and other local agencies.[3,12,58]  
46 139 In our research, we focused on interpretations of policy objectives and priorities for the ICS as a  
47 140 whole.

#### 48 49 141 **Data collection and analysis**

50 142 We used a semi-structured interview guide with questions on leaders' interpretation of national policy  
51 143 objectives on health inequalities, local priorities, and how these linked to other objectives for the ICS  
52 144 (supplementary material file 1). All participants gave informed consent verbally. Interviews were  
53 145 carried out online, lasted an average of 44 minutes, and took place between August and December  
54 146 2022. All interviews were recorded, professionally transcribed, and anonymized at the point of  
55 147 transcription. We analyzed the data using the constant comparative method of qualitative analysis.[57]  
56 148 We reviewed the transcripts line by line to identify themes in the data, and refined them iteratively as  
57 149 new concepts emerged. All authors (HA, NM, AH) reviewed a sample of the transcripts and worked  
58 150 collaboratively to develop the code structure. We used an integrated approach to do this based on the  
59 151 themes identified in the data and key domains in our interview guide.[59] One author (HA) then

1  
2  
3 152 analyzed all transcripts and the authors met regularly to discuss interpretation of the data and any  
4 153 changes to the coding framework. We used NVivo (release 1.3) to facilitate our analysis of the data.

#### 6 154 **Patient and public involvement**

7 155 No patients or members of the public were involved in this study.

### 9 156 **RESULTS**

10 157 We found varied interpretations of policy objectives on health inequalities—both within and between  
11 158 ICS areas. Leaders had different perceptions of the boundaries of ICS action on health inequalities—  
12 159 particularly the balance between action on health care and wider health inequalities. Leaders  
13 160 everywhere worried that action on health inequalities would be crowded out by other priorities.

#### 15 161 **Varied and vague interpretations**

16 162 Interpretations of national policy objectives on health inequalities varied. Some leaders interpreted  
17 163 national policy objectives for ICSs broadly—for example, as being about tackling poverty, improving  
18 164 social and economic conditions, and reducing inequalities in life expectancy. One NHS leader in ICS  
19 165 C said they were focusing on poverty as the ‘core driver of the vast majority of health inequalities  
20 166 we’re facing’. Another said, while clinical priorities and access to preventive services were important,  
21 167 ‘we’ve really tried to go at social, you know, broader determinants of health type perspectives’.

22  
23 168 Others conceptualized ICSs’ role on health inequalities as a mix of linked objectives within the NHS  
24 169 and beyond. A local authority leader in ICS B, for example, described how the ICS had a role in  
25 170 ‘tackling clinical inequality’ (such as improving diabetes outcomes for marginalized groups),  
26 171 reducing inequalities in risk factors for ill-health (such as physical activity), and acting on the ‘wider  
27 172 determinants of health’. An NHS leader in ICS A described similar objectives to prevent disease,  
28 173 reduce health care inequalities, and support action to improve social and economic conditions.

29  
30 174 But several leaders were struggling to interpret national policy objectives. A local authority leader in  
31 175 ICS C said they were unsure which inequalities they were supposed to prioritize—for instance,  
32 176 inequalities within the ‘places’ that made up their ICS, inequalities between these places, or  
33 177 inequalities between their ICS and the rest of the country. Another said leaders were ‘struggling to  
34 178 whittle down the big amorphous blob of health inequalities into some actual things that we can do’—  
35 179 and ‘going round in circles’ trying to do it. An NHS leader in ICS A said they were ‘still working it  
36 180 out’, while others pointed to governance structures or planning processes instead of their  
37 181 interpretation of national policy objectives on health inequalities or planned action to address them.

38  
39 182 Translating national policy objectives into local priorities was often a challenge. ICS leaders were in  
40 183 the process of developing their strategies when we carried out our interviews. Some could point to  
41 184 high level objectives on reducing health inequalities, such as reducing gaps in healthy life expectancy,  
42 185 or priority areas, such as improving mental health services. But others said it was too early to  
43 186 articulate priorities or felt in the dark about the process to develop them. Some felt their ICS’s  
44 187 priorities on health inequalities were vague. An NHS leader in ICS A, for instance, said:

45  
46 188 *‘I’ve been to a few meetings and [leader’s name], they all trot out the whole “la la, core20PLUS5,*  
47 189 *we’re going to do this, we’re going to make everything better”, but I haven’t heard anything specific, I*  
48 190 *haven’t heard anybody mention anything rather than just sound bites, in all honesty.’*

49 191 —NHS leader, ICS A.

50  
51 192 National guidance for ICSs did not always help provide clarity. Several leaders mentioned NHS  
52 193 England’s core20plus5 framework, which identifies priority groups for action on reducing health  
53 194 inequalities, including the 20% most deprived of the population and people with selected clinical  
54 195 conditions. Some found the framework a helpful starting point for local plans. But others thought it  
55 196 focused too narrowly on clinical priorities, might not fit their local context, or risked widening  
56 197 inequalities (if the focus was on targeting the 20% most deprived in each ICS rather than nationally).  
57 198 More broadly, leaders often thought national guidance for ICSs on health inequalities was vague:

58  
59 199 *‘Other than the usual broad brush, “oh, integrated working” and, you know, [...] “system*  
60 200 *leadership” and they bandy terms around, like this – personalised care, that’s another one. They all*

201 *talk about these kind of things and then we actually say, “alright then, well what do you mean?”*  
 202 *There’s not very much under that.’*  
 203 —NHS leader, ICS A.

204  
 205 *‘I think the thing that I see most of, and I don’t know what its status is, is the kind of core twenty plus*  
 206 *five work. That seems to have some level of visibility. Even if I don’t really understand what it means*  
 207 *in, kind of, how it translates. But beyond that, no I don’t have clarity on what the ask is.’*  
 208 —Local authority leader, ICS C.

209  
 210 Lack of clarity was not always seen as a drawback by local leaders, given they often wanted  
 211 flexibility to address local needs. But several worried about unintended consequences—including lack  
 212 of clarity on ICS objectives on health inequalities skewing priorities towards other high-profile areas  
 213 (such as objectives to increase elective care activity), or misinterpretation and inconsistent  
 214 implementation of policy objectives between ICSs (such as national policy to reduce NHS waiting  
 215 lists ‘inclusively’).

### 216 217 **Health care versus health inequalities**

218 Lack of clarity about policy objectives contributed to conflicting views about the primary role of ICSs  
 219 and where they should focus their attention. A major tension running throughout our interviews was  
 220 differing perceptions of the boundaries of ICS action on health inequalities—particularly how far the  
 221 ICS should extend its focus beyond reducing health care inequalities (such as differences in access to  
 222 care) to address the broader social and economic conditions shaping health inequalities (such as  
 223 housing conditions). Varying interpretations could be found within ICS areas and professional groups.

224  
 225 For some, ICSs would only succeed if they looked beyond health care services:

226  
 227 *‘Over many years [...] they’ve been really probably the national ill health service, focussing in on*  
 228 *treating illness and disease as opposed to thinking about primary prevention and working more*  
 229 *effectively with public health on how do we get population health outcomes improved and therefore*  
 230 *reduce health inequalities. And that lens of the wider determinants of health is to my mind the right*  
 231 *lens to be looking through in order to improve population health outcomes.’*  
 232 —Local authority leader, ICS C.

233  
 234 Others described how their ICS needed to do both—combining action on reducing health care  
 235 inequalities with broader efforts to tackle underlying social and economic conditions in their area:

236  
 237 *‘You just look at the healthy life expectancy across the patch and you can see the inequity. You look at*  
 238 *things like vaccine uptake, screening uptake, and they’re some of the, kind of, proxy measures that you*  
 239 *can see that maybe start to explain some of the differences in life expectancy. You look at smoking*  
 240 *rates, obesity rates, alcohol, all of that kind of stuff, unemployment, housing situation, and you start to*  
 241 *get to grips as to why, and, as I say, it’s clear that it’s issues greater than just what the health service*  
 242 *can manage, so it needs that integrated approach.’*  
 243 —NHS leader, ICS A.

244  
 245 But several leaders—particularly from local government—wanted their ICS to focus primarily on  
 246 health care inequalities, and worried about the consequences of NHS leaders misinterpreting their role  
 247 and purpose:

248  
 249 *‘I think there’s something for me about ensuring that the ICS is absolutely focused on healthcare*  
 250 *inequalities as its first and foremost responsibility. Get the inequalities within the NHS, what’s in their*  
 251 *grasp. [...] They’re not going to solve poverty at an ICS level.’*  
 252 —Local authority leader, ICS A.

253  
 254 *‘It’s an easy get out to say, you know, “Marmot says that it’s the social determinants that matter*  
 255 *most”. Well then, and “we need to focus on housing and jobs and things”. Well, the ICS doesn’t do*

256 *much, doesn't have big levers on housing and jobs and stuff, so yes, we can do a bit on anchor work,*  
 257 *but it's fairly marginal to what we can do to actually try and ensure that our services strive to have*  
 258 *the most equitable access and outcomes for our residents.'*

259 —Local authority leader, ICS C.

260  
 261 *'I think there is a misconception about what is the role of the NHS in tackling health inequalities. [...]*  
 262 *I always kind of giggle in the background, some people might discover health inequalities, and then*  
 263 *they go, "you know, we need to solve poverty" and you go "Christ, that'd be great. In the meantime,*  
 264 *can you just make sure your services are open on an evening and actually the transport routes are*  
 265 *fine, and actually the literacy levels of your leaflets are not of a reading age of a 20-year-old?"*

266 —Local authority leader, ICS A.

267  
 268 These differences in interpretation created potential conflict between leaders and organizations. Some  
 269 described the risk of the NHS 'stepping on toes' or failing to acknowledge others' skills and expertise.  
 270 Others worried about NHS leaders framing health inequalities as 'new' and the risk of alienating local  
 271 authorities and others with a long history of working to address them. One NHS leader described how:

272 *'I just had a conversation with the DPH [...] We were talking about some of the wider determinant*  
 273 *stuff and she said, "Well, you know, of course, that's not really the NHS's business", you know,*  
 274 *"We've got all this in our strategies" you know? So, it was just a little bit of a [...] Just a gentle, sort*  
 275 *of, shove back.'*

276 —NHS leader, ICS C.

277 Tension was not always seen as a bad thing. An NHS leader in ICS C gave the example of learning to  
 278 dance with a partner, saying 'you have to acknowledge that you will stand on each other's bloody  
 279 toes, you know', otherwise 'you don't move anywhere and you don't learn anything'. Several leaders  
 280 described ongoing conversations in their ICS to define roles and responsibilities of different  
 281 organizations, including work in one area to define the contribution of public health professionals in  
 282 the ICS. And public health leaders frequently described their efforts to help other partners in their ICS  
 283 understand different kinds of health inequalities and potential approaches to reducing them.

#### 284 **Threaded throughout or crowded out?**

285 Whatever their interpretation of the boundaries of ICS action on health inequalities, leaders often  
 286 conceptualized reducing health inequalities as a cross-cutting objective linked to other ICS priorities:

287 *'So I think whenever we discuss anything, we've got this absolute agreement we need to look at it*  
 288 *through... so we always look at things through a financial lens, a quality lens, but I think we also need*  
 289 *to start – whatever we do – we look through a health inequalities lens. Is this a line to our strategic*  
 290 *aim of reducing health inequalities, no matter what it is?'*

291 —NHS leader, ICS A.

292  
 293 *'I mean it runs through everything, it literally runs through everything doesn't it, this inequalities*  
 294 *work. Every single strategy, every single plan is what we are looking to make a shift on in terms of*  
 295 *this agenda.'*

296 —Local authority leader, ICS B.

297  
 298 *'I think we need to get to a strategy which clearly puts population health management and*  
 299 *understanding and tackling health inequalities as the core of our overarching strategy, and*  
 300 *inequalities needs to be threaded through all of our other pieces of work.'*

301 —NHS leader, ICS C.

302  
 303 But—in reality—leaders frequently described how other priorities risked crowding out action on  
 304 health inequalities. Interviewees in every ICS described how responding to acute pressures in the  
 305 NHS and social care, such as long waiting lists for elective care, tended to dominate the agenda. This  
 306 'crowding out' effect happened at a mix of levels—from senior leaders to front-line staff. An NHS  
 307 leader in ICS B, for example, described how the limited 'bandwidth' of the ICS team was being taken

up with a series of meetings on ambulance response times, elective waiting lists, and other operational pressures—and said they were ‘increasingly spending more time on those short-term issues’ over longer-term objectives. Another NHS leader in ICS C described how their clinicians ‘would love to be spending more time’ on initiatives to reduce health inequalities, such as a local programme where respiratory consultants visited a community hub to provide clinical advice alongside other services focused on housing, food, benefits, and other social needs—‘but they are saying we can’t because we’ve got these clinics to do and we’ve got these patients to see and we’ve got a full ED department’.

Leaders gave a mix of explanations for this crowding out effect. One was that pressures on the NHS, like long ambulance response times, were the most visible priorities. Another was that pressures on the NHS were so extreme—so ‘unacceptably bad’, as one local authority leader in ICS A put it—that short-term action to address them was understandable, and might even be needed to create space for work on health inequalities. One NHS leader in ICS C said: ‘if we don’t get through winter, then, you know, nobody’s going to give us the time of day to do the other stuff’. Others pointed to the lack of resources—people and money—to deliver objectives on health inequalities. An NHS leader in ICS A described the risk ‘that the secondary care hospital sector sucks every possible penny of growth’.

But the approach of national policymakers was also identified as a major factor shaping local priorities and behaviour. Despite the presence of health inequalities in national policy documents, local leaders frequently described how the overriding focus from national NHS bodies and politicians was on holding ICSs to account for NHS performance—a focus that appeared to be increasing:

*‘I don’t think I’ve had a conversation on health inequalities or population health with NHS England since we’ve been in existence, but I’d need more than my fingers and toes to count the number of conversations I’ve had on ambulance handover. We’re really being driven to be focused on optimising the existing system’s delivery.’*

—NHS leader, ICS A.

*‘I mean, the chair of the ICS, [name], I think is fine. I think [they] gets it but, of course, you know, the way the NHS, because they’re part of the NHS, the NHS is the NHS, so, they call the chiefs and chief executives in and berate them for their performance on ambulances. You know what I mean? That’s the top of the priority. I don’t know if they even talk at these meetings about inequalities, you know? It’s all about performance.’*

—Local authority leader, ICS B.

*‘I cannot explain in seven weeks, eight weeks, how much their focus has changed, it’s unbelievable. It’s almost as if, if you came into one job as an ICB chief exec, and you’ve got another job now, which is basically being the chief operating officer for the system, and that is the absolute focus from them, you know. So I’m on, you know, regular phone calls with them about those short-term issues, whether it’s private care access, ambulance turnaround times, 104 week wait, 78 week waits, cancer waiting times. That is the absolute focus.’*

—NHS leader, ICS B.

## DISCUSSION

We analysed local interpretations of national health inequalities objectives in three more socioeconomically deprived ICSs in England. Overall, we found local interpretations of policy objectives on health inequalities varied, and local leaders had contrasting—sometimes conflicting—perceptions of the boundaries of ICS action. Translating national objectives into local priorities was often a challenge, and clarity from national policymakers was frequently perceived as limited or lacking. Across the three ICSs, local leaders worried that objectives on reducing health inequalities were being crowded out by other policy priorities, such as pressures on NHS hospitals. The behaviour of national policymakers appeared to undermine their stated priorities on reducing health inequalities.

Vagueness in NHS policy on health inequalities is nothing new. National NHS bodies in England committed to stronger action to reduce health inequalities in 2019,[26,27] but lacked a systematic

1  
2  
3 361 approach to achieving it[31] and expected local leaders—early versions of ICSs—to develop their  
4 362 own approaches. Olivera et al analysed the local plans that followed and found health inequalities  
5 363 were conceptualized vaguely and inconsistently, echoing the broader vagueness in national NHS  
6 364 policy.[30] In 2012, Warwick-Giles et al found that the NHS’s new clinical commissioning groups—  
7 365 organizations established to purchase local health services under the Lansley reforms in 2012, before  
8 366 being scrapped under the latest round of NHS reforms in 2022—were unclear on their duties to tackle  
9 367 health inequalities, and suffered from limited guidance from national policymakers.[48] Looking  
10 368 further back, Exworthy and Powell found similarly ‘muddy’ NHS objectives on health inequalities in  
11 369 the 1990s and 2000s.[29] This is, perhaps, unsurprising. How local agencies ‘translate’ national policy  
12 370 in their own context is a central part of the policy process—and often an intentional policy  
13 371 feature.[60,61,62] Varied understandings of concepts linked to health inequalities and their causes are  
14 372 widespread.[33,32]

16 373 But lack of clarity among ICS leaders on health inequalities brings major risks. Health inequalities are  
17 374 complex and deeply rooted. Reducing them is challenging, but possible.[63,64] Yet progress on  
18 375 reducing health inequalities will not happen unless national and local agencies take a coherent and  
19 376 systematic approach—including clarity on the ‘problem’ to be addressed, priorities and principles for  
20 377 action, and potential interventions at different levels.[31,65,66,67] Without this, there is a risk of  
21 378 interventions being poorly targeted, conflict and confusion between local agencies, and broad  
22 379 strategies that fail to translate into action. Local leaders also risk being judged against measures they  
23 380 have limited power or resources to improve.[68] ICSs may even inadvertently widen inequalities—for  
24 381 instance, if some groups receive disproportionate attention, individual-level interventions are pursued  
25 382 without wider system-level changes, or efforts to tackle inequalities within ICSs are not matched with  
26 383 wider policy to reduce inequalities between them.[30,31,69,70] National NHS bodies have produced  
27 384 guidance for ICSs on reducing health inequalities, including priorities for ‘recovering’ services after  
28 385 covid-19 and the core20plus5 framework.[15,16] But our research suggests that more clarity is needed  
29 386 to guide ICS action—including the respective roles of NHS-led ICBs and other partnership groups  
30 387 and bodies at a local level.

33 388 Some of these risks appeared to be playing out already in our research. A major unresolved tension  
34 389 among local leaders was differing perceptions of the boundary for ICS action on health inequalities—  
35 390 particularly how far the ICS should extend its focus beyond reducing health care inequalities (such as  
36 391 differences in access to health care) to address the broader social and economic conditions shaping  
37 392 health inequalities (such as housing conditions). Studies often report that health system leaders  
38 393 predominantly focus on individual-level interpretations of health inequalities—for instance,  
39 394 emphasizing individual risk factors for ill-health and the importance of improving access to  
40 395 services.[32] Recent analysis of local health system plans in England, produced by early versions of  
41 396 ICSs, also found that areas tended to frame action on preventing ill-health and reducing health  
42 397 inequalities narrowly—for instance, focusing on individual behaviour change or better disease  
43 398 management.[30,34]

45 399 Our research painted a more complex picture. Leaders from across professional groups—including the  
46 400 NHS, public health, and social care—held varied views about ICSs’ remit on health inequalities. NHS  
47 401 leaders often emphasized social and economic factors, like poverty or housing, as key drivers of  
48 402 health inequalities to be tackled by the ICS. Yet several local authority leaders were concerned about  
49 403 the NHS misunderstanding its role and focus—for instance, NHS leaders ‘discovering’ health  
50 404 inequalities and social determinants of health but failing to sufficiently recognize their primary role in  
51 405 tackling the health care inequalities more firmly within the NHS’s control. Unclear or unrealistic  
52 406 aims, competing agendas, and failure to understand other organizations’ expertise can all hold back  
53 407 partnership working.[55] NHS reforms in 2012 transferred public health functions out of the NHS and  
54 408 into local government.[71,72] Yet the complex structure of England’s new ICSs—each made up of  
55 409 several overlapping partnership bodies, including an NHS-led agency coupled with a broader  
56 410 partnership of local organizations—risks causing confusion.[73] There are also broader risks from  
57 411 greater NHS action on social determinants of health, such as medicalizing poverty and other social  
58 412 issues (for instance, by framing structural social issues as problems that can be diagnosed and treated



413 by clinicians) and inefficient allocation of resources to address them.[69,74] Future research should  
414 explore this tension further and how the framing of NHS plans on health inequalities may be shifting.

415 Finally, our research highlights how ICS objectives on reducing health inequalities are being crowded  
416 out by higher profile policy objectives, such as reducing pressure on acute hospitals and improving  
417 ambulance performance. Pressures on the NHS are extreme: by September 2023, the waiting list for  
418 routine hospital treatment in England had reached almost 8 million—the highest since records  
419 began—and 28% of people attending emergency departments waited more than four hours to be  
420 seen.[75] Evidence from a long line of policy initiatives in England tells us that broader goals on  
421 improving health and reducing inequalities often fade as pressures on NHS services and finances  
422 increase.[76,37] Despite rhetoric about long-term policy, national NHS bodies and government  
423 frequently focus on ‘hard’ targets (like the size of waiting lists) and short-term political priorities  
424 instead.[37,54,77] Our research suggests the same phenomenon was happening to ICSs almost as  
425 soon as they were introduced. This represents a repeated failure among national policymakers to learn  
426 from past policy.

### 427 **Limitations**

428 Our study has several limitations. First, we focused on gaining in-depth insights from three ICSs (out  
429 of 42 in total), so our findings represent the specific experiences of leaders in these case study sites  
430 rather than general experiences of ICSs across England. However, our structured sampling approach  
431 meant we were able to target ICSs with varied characteristics all experiencing high levels of  
432 socioeconomic deprivation. Leaders in these ICSs are likely to be particularly aware of their role in  
433 reducing health inequalities—and our findings are likely to have strong relevance to ICSs serving  
434 similar populations. The findings are also relevant to national policymakers targeting efforts to reduce  
435 health inequalities at more socioeconomically deprived groups.[15]

436 Second, our interviews focused on senior leaders in ICSs. This meant we were able to understand the  
437 high-level perspectives of the most senior leaders responsible for overseeing and directing the ICSs  
438 work on health inequalities. Our sample included a diverse mix of leaders from NHS providers, ICBs,  
439 local authorities, and other community-based groups. But our research does not focus on the  
440 perspectives of people directly providing services or patients and service users experiencing  
441 inequalities.

442 Third, we carried out our fieldwork between August and December 2022—early in the evolution of  
443 ICSs (formally established in July 2022). This allowed us to understand leaders’ perspectives as they  
444 developed their system’s plans, and—in some cases—new teams to deliver them. But it also means  
445 our research represents leaders’ initial interpretations of policy objectives on health inequalities—  
446 interpretations that are likely to evolve. That said, ICSs have existed informally for several  
447 years[54,50,73] and national policy initiatives over decades have encouraged local partnerships on  
448 health inequalities.[4]

### 449 **CONCLUSION**

450 Reforms to the NHS in England established 42 integrated care systems responsible for planning and  
451 coordinating local health and care services. The changes are based on the idea that cross-sector  
452 collaboration is needed to improve health and reduce health inequalities—and similar policy changes  
453 are happening elsewhere in the UK and internationally. We used qualitative methods to explore local  
454 interpretations of national policy objectives on health inequalities in England among senior leaders  
455 working in three ICSs—including from the NHS, social care, public health, and community-based  
456 organizations. Local leaders had varying interpretations of national policy objectives and different  
457 views on the boundaries for ICS action. Clarity from national policymakers was frequently perceived  
458 as limited or lacking. Across all three ICS areas, local leaders were concerned that objectives on  
459 reducing health inequalities were being crowded out by other policy priorities. Our findings have  
460 implications for policy and practice—including the need for greater conceptual clarity as ICSs and  
461 other national policies encouraging cross-sector collaboration to reduce health inequalities evolve.

462 -----

1  
2  
3 **463 Funding statement**

4 464 HA's research that contributed to this article was funded by the Health Foundation. HA is Director of  
5 465 Policy at the Health Foundation. This research received no specific grant from any funding agency in  
6 466 the public, commercial or not-for-profit sectors.  
7

8 **467 Author contributions**

9 468 HA, NM, and AH identified the research question and led the design and development of the study.  
10 469 HA carried out the interviews with ICS leaders. HA, NM, and AH reviewed interview transcripts,  
11 470 identified themes in the data, developed the code structure, and interpreted the data. HA coded and  
12 471 analysed all interview transcripts. HA wrote the first draft of the manuscript and incorporated  
13 472 comments from AH and NM. All authors read and approved the final manuscript. All authors are  
14 473 researchers in health policy and public health in the UK and have experience carrying out qualitative  
15 474 and mixed methods research—including research into similar policy initiatives in England.  
16

17 **475 Competing interests**

18 476 None declared.  
19

20 **477 Data availability statement**

21 478 No data are available.  
22

23 **479 Ethics approval**

24 480 NHS HRA approval for the study was granted on February 1 2022 (IRAS ID: 311479; REC ref:  
25 481 22/HRA/0415). Ethical approval for the study was granted by the London School of Hygiene and  
26 482 Tropical Medicine research ethics committee on February 22 2022 (LSHTM ethics ref: 26737). All  
27 483 participants gave informed consent before taking part in the study.  
28  
29  
30  
31  
32  
33  
34  
35  
36  
37  
38  
39  
40  
41  
42  
43  
44  
45  
46  
47  
48  
49  
50  
51  
52  
53  
54  
55  
56  
57  
58  
59  
60

## REFERENCES

- 1 UK Government. Health and Care Act 2022. <https://bills.parliament.uk/bills/3022/publications>
- 2 Alderwick H, Gardner T, Mays N. England's new health and care bill. *BMJ*. 2021;374:n1767.
- 3 Dunn P, Fraser C, Williamson S, Alderwick H. Integrated care systems: what do they look like? Health Foundation. 2022. <https://www.health.org.uk/publications/long-reads/integrated-care-systems-what-do-they-look-like>
- 4 Alderwick H, Hutchings A, Mays N. A cure for everything and nothing? Local partnerships for improving health in England. *BMJ*. 2022;378:e070910.
- 5 Anderson M, Pitchforth E, Edwards N, Alderwick H, McGuire A, Mossialos E. United Kingdom: health system review. *Health Syst Transit*. 2022;24:1-194.pmid:35579557.
- 6 Alley DE, Asomugha CN, Conway PH, Sanghavi DM. Accountable health communities—addressing social needs through Medicare and Medicaid. *N Engl J Med*. 2016;374:8-11.
- 7 Raleigh V. What is happening to life expectancy in England? King's Fund. 2022. <https://www.kingsfund.org.uk/publications/whats-happening-life-expectancy-england>
- 8 Office for National Statistics. Health state life expectancies by national deprivation deciles, England: 2018 to 2020. 2022. <https://www.ons.gov.uk/peoplepopulationandcommunity/healthandsocialcare/healthinequalities/bulletins/healthstatelifeexpectanciesbyindexofmultipledeprivationimd/2018to2020>
- 9 Cookson R, Propper C, Asaria M, Raine R. Socio-economic inequalities in health care in England. *Fiscal Studies*. 2016;37(3-4):341:403.
- 10 Stoye G, Zaranko B, Shipley M, McKee M, Brunner EJ. Educational Inequalities in Hospital Use Among Older Adults in England, 2004-2015. *Milbank Quarterly*. 2020;98(4):1134-1170.
- 11 Fisher R, Allen L, Malhotra AM, Alderwick H. Tackling the inverse care law: analysis of policies to improve general practice in deprived areas since 1990. London: Health Foundation. 2022. <https://www.health.org.uk/publications/reports/tackling-the-inverse-care-law>
- 12 NHS England. Integrated care systems: design framework. 2021. <https://www.england.nhs.uk/wp-content/uploads/2021/06/B0642-ics-design-framework-june-2021.pdf>
- 13 Hill Dickinson, The Strategy Unit. Briefing note for integrated care boards on legal duties in respect of reducing inequalities. 2022. <https://www.midlandsdecisionsupport.nhs.uk/wp-content/uploads/2022/08/Briefing-note-for-Integrated-Care-Boards.pdf>
- 14 NHS England. 2021/22 priorities and operational planning guidance: implementation guidance. 2021. <https://www.england.nhs.uk/wp-content/uploads/2021/03/B0468-implementation-guidance-21-22-priorities-and-operational-planning-guidance.pdf>
- 15 NHS England. Core20PLUS5 (adults): an approach to reducing healthcare inequalities. <https://www.england.nhs.uk/about/equality/equality-hub/national-healthcare-inequalities-improvement-programme/core20plus5/>
- 16 NHS England. 2023/24 priorities and operational planning guidance. 2023. <https://www.england.nhs.uk/wp-content/uploads/2022/12/PRN00021-23-24-priorities-and-operational-planning-guidance-v1.1.pdf>
- 17 Barnes M, Bauld M, Benzeval M, Mackenzie M, Sullivan H, Judge K. Health action zones: partnerships for health equity. 2005. Abingdon, New York: Routledge.
- 18 National Evaluation of Health Action Zones. Health Action Zones: Learning to make a difference. Findings from a preliminary review of Health Action Zones and proposals for a national evaluation. 1999. <https://www.pssru.ac.uk/pub/dp1546.pdf>
- 19 Bate A, Foster D. Sure Start (England). House of Commons Library. 2017. <https://researchbriefings.files.parliament.uk/documents/CBP-7257/CBP-7257.pdf>
- 20 Belsky J, Melhuish E, Barnes J. Research and policy in developing an early years' initiative: the case of sure start. *International Journal of Child Care and Education Policy*. 2008;2:1-13. <https://link.springer.com/article/10.1007/2288-6729-2-2-1>
- 21 Department of the Environment, Transport and the Regions. Local Strategic Partnerships: government guidance summary. 2001.

- 1  
2  
3  
4 [https://webarchive.nationalarchives.gov.uk/ukgwa/20010815042253/http://www.local-](https://webarchive.nationalarchives.gov.uk/ukgwa/20010815042253/http://www.local-regions.detr.gov.uk:80/lsp/guidance/index.htm)  
5 [regions.detr.gov.uk:80/lsp/guidance/index.htm](https://webarchive.nationalarchives.gov.uk/ukgwa/20010815042253/http://www.local-regions.detr.gov.uk:80/lsp/guidance/index.htm)  
6 22 Geddes M, Davis J, Fuller C. Evaluating local strategic partnerships: theory and practice of  
7 change. *Local Government Studies*. 2007;33(1):97-116.  
8 23 Department of Health. Reducing health inequalities: an action report. London: Department of  
9 Health; 1999.  
10 24 HM Treasury, Department of Health. Tackling health inequalities: summary of the 2002 cross-  
11 cutting review. London: Department of Health; 2002.  
12 25 Department of Health. Tackling health inequalities: a programme for action. London: Department  
13 of Health; 2003.  
14 26 NHS England. The NHS long term plan. 2019. [https://www.longtermplan.nhs.uk/wp-](https://www.longtermplan.nhs.uk/wp-content/uploads/2019/08/nhs-long-term-plan-version-1.2.pdf)  
15 [content/uploads/2019/08/nhs-long-term-plan-version-1.2.pdf](https://www.longtermplan.nhs.uk/wp-content/uploads/2019/08/nhs-long-term-plan-version-1.2.pdf)  
16 27 NHS England. NHS long term plan implementation framework. 2019.  
17 [https://www.longtermplan.nhs.uk/wp-content/uploads/2019/06/long-term-plan-implementation-](https://www.longtermplan.nhs.uk/wp-content/uploads/2019/06/long-term-plan-implementation-framework-v1.pdf)  
18 [framework-v1.pdf](https://www.longtermplan.nhs.uk/wp-content/uploads/2019/06/long-term-plan-implementation-framework-v1.pdf)  
19 28 Graham H, Kelly M. Health inequalities: Concepts, frameworks and policy. Health Development  
20 Agency. 2004.  
21 [https://elevateni.org/app/uploads/2022/01/Health\\_Inequalities\\_Concepts\\_Frameworks\\_and\\_Policy.pd](https://elevateni.org/app/uploads/2022/01/Health_Inequalities_Concepts_Frameworks_and_Policy.pdf)  
22 [f](https://elevateni.org/app/uploads/2022/01/Health_Inequalities_Concepts_Frameworks_and_Policy.pdf)  
23 29 Exworthy M, Powell M. Big windows and little windows: implementation in the congested state.  
24 *Public Administration*. 2004;82(2):263-281.  
25 30 Olivera JN, Ford J, Sowden S, Bamba C. Conceptualisation of health inequalities by local  
26 healthcare systems: A document analysis. *Health Soc Care Community*. 2022;30(6):e3977-e3984.  
27 31 Ford J, Sowden S, Olivera J, Bamba C, Gimson A, Aldridge R, Brayne C. Transforming health  
28 systems to reduce health inequalities. *Future Healthc J*. 2021 Jul;8(2):e204-e209.  
29 32 McMahon NE. What shapes local health system actors' thinking and action on social inequalities in  
30 health? A meta-ethnography. *Soc Theory Health*. 2023;21(2):119-139.  
31 33 Alderwick H, Gottlieb LM. Meanings and Misunderstandings: A Social Determinants of Health  
32 Lexicon for Health Care Systems. *Milbank Q*. 2019;97(2):407-419.  
33 34 Briggs, ADM, Göpfert A, Thorlby R, Allwood D, Alderwick, H. Integrated health and care  
34 systems in England: can they help prevent disease? *Integrated Healthcare Journal*, 2;e000013.  
35 doi:10.1136/ihj-2019-000013 ISSN 2399-5351.  
36 35 Exworthy M, Blane D, Marmot M. Tackling health inequalities in the United Kingdom: the  
37 progress and pitfalls of policy. *Health Serv Res*. 2003 Dec;38(6 Pt 2):1905-21.  
38 36 Finch D, Vriend M. Public health grant: what it is and why greater investment is needed. 2023.  
39 [https://www.health.org.uk/news-and-comment/charts-and-infographics/public-health-grant-what-it-is-](https://www.health.org.uk/news-and-comment/charts-and-infographics/public-health-grant-what-it-is-and-why-greater-investment-is-needed)  
40 [and-why-greater-investment-is-needed](https://www.health.org.uk/news-and-comment/charts-and-infographics/public-health-grant-what-it-is-and-why-greater-investment-is-needed)  
41 37 Exworthy M, Berney L, Powell M. 'How great expectations in Westminster may be dashed  
42 locally': the local implementation of national policy on health inequalities. *Policy & Politics*.  
43 2002;30(1):79-96.  
44 38 Lewis RQ, Checkland K, Durand MA, Ling T, Mays N, Roland M, Smith JA. Integrated Care in  
45 England: what can we Learn from a Decade of National Pilot Programmes? *Int J Integr Care*.  
46 2021;21(4):5.  
47 39 Rochefort DA, Cobb RW (eds). The politics of problem definition: shaping the policy agenda.  
48 University Press of Kansas; 1994.  
49 40 Head BW. Wicked problems in public policy: understanding and responding to complex  
50 challenged. Palgrave Macmillan;2022. <https://doi.org/10.1007/978-3-030-94580-0>  
51 41 Koon AD, Hawkins B, Mayhew SH. Framing and the health policy process: a scoping review.  
52 *Health Policy Plan*. 2016 Jul;31(6):801-16.  
53 42 Fischer, Frank. Reframing Public Policy: Discursive Politics and Deliberative Practices. Oxford:  
54 Oxford University Press; 2003.  
55  
56  
57  
58  
59  
60

- 43 Blackman T, Harrington B, Elliott E, Greene A, Hunter DJ, Marks L, McKee L, Williams G. Framing health inequalities for local intervention: comparative case studies. *Sociol Health Illn*. 2012;34(1):49-63.
- 44 Blackman, T, Elliott, E, Greene, A, Harrington, B, Hunter, D, Marks, L, McKee, L, Williams, G & Smith, K. 'Tackling health inequalities in post-devolution Britain: Do targets matter?', *Public Administration*. 2009;87(4):762-778.
- 45 Exworthy M, Morcillo V. Primary care doctors' understandings of and strategies to tackle health inequalities: a qualitative study. *Prim Health Care Res Dev*. 2019 May 21;20:e20.
- 46 Babbel B, Mackenzie M, Hastings A, Watt G. How do general practitioners understand health inequalities and do their professional roles offer scope for mitigation? Constructions derived from the deep end of primary care. *Critical Public Health*. 2017;29(2):1-13.
- 47 Pauly BM, Shahram SZ, Dang PTH, Marcellus L, MacDonald M. Health Equity Talk: Understandings of Health Equity among Health Leaders. *AIMS Public Health*. 2017 Nov 15;4(5):490-512.
- 48 Warwick-Giles L, Coleman A, Checkland K. Making Sense of Inequalities: How Do Clinical Commissioning Groups in England Understand their New Role? *Social Policy and Administration*. 2016. 51(7):1231-1247.
- 49 Mead R, Thurston M, Bloyce D. From public issues to personal troubles: Individualising social inequalities in health within local public health partnerships. *Critical Public Health*. 2020 doi: 10.1080/09581596.2020.1763916.
- 50 Ham H, Alderwick H, Dunn P, McKenna H. Delivering sustainability and transformation plans: from ambitious proposals to credible plans. London: King's Fund; 2017.
- 51 Moran V, Allen P, Sanderson M, McDermott I, Osipovic D. Challenges of maintaining accountability in networks of health and care organisations: A study of developing Sustainability and Transformation Partnerships in the English National Health Service. *Soc Sci Med*. 2021;268:113512.
- 52 Sanderson M, Allen P, Osipovic D, et al. Developing architecture of system management in the English NHS: evidence from a qualitative study of three Integrated Care Systems. *BMJ Open* 2023;13:e065993.
- 53 Sanderson M, Allen P, Osipovic D, et al. The Developing Architecture of System Management: Integrated Care Systems and Sustainability and Transformation Partnerships. 2022. <https://prucomm.ac.uk/assets/uploads/The%20Developing%20Architecture%20of%20System%20Management%20Integrated%20Care.pdf>
- 54 Alderwick H, Dunn P, McKenna H, Walsh N, Ham C. Sustainability and transformation plans in the NHS: how are they being developed in practice? London: King's Fund. 2016.
- 55 Alderwick, H., Hutchings, A., Briggs, A. et al. The impacts of collaboration between local health care and non-health care organizations and factors shaping how they work: a systematic review of reviews. *BMC Public Health*. 2021;21,753.
- 56 NHS England. Establishing integrated care systems by April 2021. [https://www.england.nhs.uk/wp-content/uploads/2019/03/07\\_MiCIE\\_PB\\_28\\_03\\_2019-Establishing-ICSs-by-April-2021.pdf](https://www.england.nhs.uk/wp-content/uploads/2019/03/07_MiCIE_PB_28_03_2019-Establishing-ICSs-by-April-2021.pdf)
- 57 Patton MQ. Qualitative research and evaluation methods. 3rd ed. Thousand Oaks (CA): Sage Publications; 2002.
- 58 Charles A. Integrated care systems explained. King's Fund. 2022. <https://www.kingsfund.org.uk/publications/integrated-care-systems-explained>
- 59 Bradley EH, Curry LA, Devers KJ. Qualitative data analysis for health services research: developing taxonomy, themes, and theory. *Health Serv Res*. 2007;42(4):1758-72.
- 60 Nilsen P, Ståhl C, Roback K, Cairney P. Never the twain shall meet? A comparison of implementation science and policy implementation research. *Implement Sci*. 2013;10;8:63.
- 61 Schofield J. Time for a revival? Public policy implementation: a review of the literature and an agenda for future research. *International Journal of Management Reviews*. 2001;3:245-263.
- 62 Sausman C, Oborn E, Barrett M. Policy translation through localisation: implementing national policy in the UK. *Policy & Politics*. 2016;44(4):563-589.

- 1  
2  
3  
4  
5  
6  
7  
8  
9  
10  
11  
12  
13  
14  
15  
16  
17  
18  
19  
20  
21  
22  
23  
24  
25  
26  
27  
28  
29  
30  
31  
32  
33  
34  
35  
36  
37  
38  
39  
40  
41  
42  
43  
44  
45  
46  
47  
48  
49  
50  
51  
52  
53  
54  
55  
56  
57  
58  
59  
60
- 
- 63 Holdroyd I, Vodden A, Srinivasan A, Kuhn I, Bamba C, Ford JA. Systematic review of the effectiveness of the health inequalities strategy in England between 1999 and 2010. *BMJ Open* 2022;12:e063137.
- 64 Vodden A, Holdroyd I, Bentley C, et al. Evaluation of the national governmental efforts between 1997 and 2010 in reducing health inequalities in England. *Public Health* 2023;218:128-35.
- 65 Thimm-Kaiser M, Benzekri A, Guilamo-Ramos V. Conceptualizing the Mechanisms of Social Determinants of Health: A Heuristic Framework to Inform Future Directions for Mitigation. *The Milbank Quarterly*. 2023; 101(2):486-526. doi: <https://doi.org/10.1111/1468-0009.12642>
- 66 Solar O, Irwin A. A Conceptual Framework for Action on the Social Determinants of Health: Social Determinants of Health Discussion Paper 2. World Health Organization; 2010. <https://iris.who.int/handle/10665/44489>
- 67 Porroche-Escudero A, Popay J, Ward F, et al. From fringe to centre-stage: experiences of mainstreaming health equity in a health research collaboration. *Health Res Policy Sys*. 2021;19:28.
- 68 Capper B, Ford J, Kelly M. Has the pandemic resulted in a renewed and improved focus on health inequalities in England? A discourse analysis of the framing of health inequalities in national policy. *Public Health Pract (Oxf)*. 2023;6;5:100382.
- 69 Buzelli L, Dunn P, Scott S, Gottlieb L, Alderwick H. A framework for NHS action on social determinants of health. Health Foundation. 2022. <https://www.health.org.uk/publications/long-reads/a-framework-for-nhs-action-on-social-determinants-of-health>
- 70 Fisher R, Allen L, Malhotra AM, Alderwick H. Tackling the inverse care law: Analysis of policies to improve general practice in deprived areas since 1990. London: Health Foundation. 2022.
- 71 Gadsby EW, Peckham S, Coleman A, et al. Commissioning for health improvement following the 2012 health and social care reforms in England: what has changed?. *BMC Public Health*. 2017;17:211.
- 72 UK Government. Health and Social Care Act 2012. <https://www.legislation.gov.uk/ukpga/2012/7/contents/enacted>
- 73 Alderwick H, Dunn P, Gardner T, Mays N, Dixon J. Will a new NHS structure in England help recovery from the pandemic? *BMJ*. 2021;372:n248.
- 74 Lantz PM, Goldberg DS, Gollust SE. The Perils of Medicalization for Population Health and Health Equity. *Milbank Q*. 2023;101(S1):61-82.
- 75 Nuffield Trust. NHS performance tracker. <https://www.nuffieldtrust.org.uk/qualitywatch/nhs-performance-summary>
- 76 Lewis RQ, Checkland K, Durand MA, et al. Integrated Care in England – what can we Learn from a Decade of National Pilot Programmes? *International Journal of Integrated Care*. 2021;21:5. doi: 10.5334/ijic.5631
- 77 Mannion R, Braithwaite J. Unintended consequences of performance measurement in healthcare: 20 salutary lessons from the English National Health Service. *Intern Med J*. 2012;42(5):569-74.

## INTERVIEW GUIDE

*[Note: this analysis on interpretations of policy objectives on health inequalities is part of a larger study on cross-sector collaboration to reduce health inequalities in England. We include the full interview guide for the study below, but the analysis only reports data from a sub-set of questions.]*

(1) Let's start by having you describe what you do. Could you tell me about your role?

- (a) Title and responsibilities
- (b) Role in the ICS (and/or how their organization fits in the ICS)

### *Interpretation of national policy objectives and local priorities*

(2) One of the overall national policy objectives for integrated care systems is to reduce health inequalities. Could you tell me about how you've interpreted this objective?

- (a) What types of inequalities are you being asked to reduce? (Eg health care, health outcomes)
- (b) Is there clarity from policymakers on the groups to target? (Eg deprivation, ethnicity)
- (c) Are there any key goals or measures that you're aiming for, or being measured against?

(3) Could you tell me about your ICSs' priorities for reducing health inequalities?

- (a) How have local priorities on reducing health inequalities been developed? Role of the ICB/P?
- (b) How far are these priorities shared between local agencies, including those beyond the NHS?

### *Content of local approaches to reduce inequalities*

For this study, we're interested in approaches being developed to reduce health inequalities that involve collaboration between NHS and non-NHS organizations, like local government or housing providers. This might be new ways of planning or delivering services.

(4) Could you tell me about the main approaches or interventions being developed in your ICS/organization that involve this kind of collaboration to tackle health inequalities?

*[Note each approach or intervention mentioned, and for each one probe:]*

- (a) What is the focus of the approach? (eg population group, services, or process)
- (b) What does the approach involve? (eg types of interventions or activities)
- (c) What organizations are involved? (ie which NHS and non-NHS agencies)
- (d) How do NHS and non-NHS organizations work together to deliver the approach?
- (e) Where did the approach come from?

### *How local agencies are collaborating to reduce inequalities*

Standing back, we want to know about how agencies are coordinating work on reducing health inequalities within the ICS, and the kind of things that make collaboration easier or harder.

(5) Could you tell me about how work on health inequalities is led and managed in your ICS?

- (a) How does decision-making on health inequalities work?
- (b) Are there clear roles and responsibilities for different local agencies linked to inequalities?
- (c) How does the leadership of the ICS demonstrate its support for work on health inequalities?
- (d) How are resources and other kinds of support—like people, funding, or management capacity—made available to support the ICSs work on reducing health inequalities?

(6) Now I want to talk about things that shape how well agencies work together on reducing health inequalities—and I'm particularly thinking about collaboration between NHS organizations, like

1  
2  
3 hospitals or the ICB, and non-NHS organizations, like local government. So first, things that help:  
4 what do you think supports, or has supported, efforts to reduce health inequalities in your area?  
5

6  
7 (7) And now things that can get in the way: could you tell me about the main barriers or challenges to  
8 collaboration between NHS and non-NHS organizations on reducing health inequalities?  
9

10  
11 (8) Thinking about the range of other priorities for your ICS, like reducing waiting times for hospital  
12 treatment, how does work on reducing health inequalities fit in?

13  
14 (9) Before we finish, is there anything we haven't talked about yet that you feel is important to  
15 understand how local agencies in your area are working together to reduce health inequalities?  
16  
17  
18  
19  
20  
21  
22  
23  
24  
25  
26  
27  
28  
29  
30  
31  
32  
33  
34  
35  
36  
37  
38  
39  
40  
41  
42  
43  
44  
45  
46  
47  
48  
49  
50  
51  
52  
53  
54  
55  
56  
57  
58  
59  
60

For peer review only



## Standards for Reporting Qualitative Research (SRQR)\*

<http://www.equator-network.org/reporting-guidelines/srqr/>

Page/line no(s).

### Title and abstract

|                                                                                                                                                                                                                                                              |                           |
|--------------------------------------------------------------------------------------------------------------------------------------------------------------------------------------------------------------------------------------------------------------|---------------------------|
| <p><b>Title</b> - Concise description of the nature and topic of the study Identifying the study as qualitative or indicating the approach (e.g., ethnography, grounded theory) or data collection methods (e.g., interview, focus group) is recommended</p> | <p>Page 2, lines 1-3</p>  |
| <p><b>Abstract</b> - Summary of key elements of the study using the abstract format of the intended publication; typically includes background, purpose, methods, results, and conclusions</p>                                                               | <p>Page 2, lines 4-26</p> |

### Introduction

|                                                                                                                                                                     |                               |
|---------------------------------------------------------------------------------------------------------------------------------------------------------------------|-------------------------------|
| <p><b>Problem formulation</b> - Description and significance of the problem/phenomenon studied; review of relevant theory and empirical work; problem statement</p> | <p>Pages 2-3, lines 39-87</p> |
| <p><b>Purpose or research question</b> - Purpose of the study and specific objectives or questions</p>                                                              | <p>Page 3, lines 83-87</p>    |

### Methods

|                                                                                                                                                                                                                                                                                                                                                                                                             |                                |
|-------------------------------------------------------------------------------------------------------------------------------------------------------------------------------------------------------------------------------------------------------------------------------------------------------------------------------------------------------------------------------------------------------------|--------------------------------|
| <p><b>Qualitative approach and research paradigm</b> - Qualitative approach (e.g., ethnography, grounded theory, case study, phenomenology, narrative research) and guiding theory if appropriate; identifying the research paradigm (e.g., postpositivist, constructivist/ interpretivist) is also recommended; rationale**</p>                                                                            | <p>Pages 3-4, lines 88-142</p> |
| <p><b>Researcher characteristics and reflexivity</b> - Researchers' characteristics that may influence the research, including personal attributes, qualifications/experience, relationship with participants, assumptions, and/or presuppositions; potential or actual interaction between researchers' characteristics and the research questions, approach, methods, results, and/or transferability</p> | <p>Page 10, lines 446-453</p>  |
| <p><b>Context</b> - Setting/site and salient contextual factors; rationale**</p>                                                                                                                                                                                                                                                                                                                            | <p>Pages 3-4, lines 93-129</p> |
| <p><b>Sampling strategy</b> - How and why research participants, documents, or events were selected; criteria for deciding when no further sampling was necessary (e.g., sampling saturation); rationale**</p>                                                                                                                                                                                              | <p>Pages 3-4, lines 93-122</p> |
| <p><b>Ethical issues pertaining to human subjects</b> - Documentation of approval by an appropriate ethics review board and participant consent, or explanation for lack thereof; other confidentiality and data security issues</p>                                                                                                                                                                        | <p>Page 10, lines 456-460</p>  |
| <p><b>Data collection methods</b> - Types of data collected; details of data collection procedures including (as appropriate) start and stop dates of data collection and analysis, iterative process, triangulation of sources/methods, and modification of procedures in response to evolving study findings; rationale**</p>                                                                             | <p>Page 4, lines 130-142</p>   |

|                       |                                                                                                                                                                                                                                                       |                       |
|-----------------------|-------------------------------------------------------------------------------------------------------------------------------------------------------------------------------------------------------------------------------------------------------|-----------------------|
| 1<br>2<br>3<br>4<br>5 | <b>Data collection instruments and technologies</b> - Description of instruments (e.g., interview guides, questionnaires) and devices (e.g., audio recorders) used for data collection; if/how the instrument(s) changed over the course of the study | Page 4, lines 130-142 |
| 6<br>7<br>8           | <b>Units of study</b> - Number and relevant characteristics of participants, documents, or events included in the study; level of participation (could be reported in results)                                                                        | Page 4, lines 120-122 |
| 9<br>10<br>11<br>12   | <b>Data processing</b> - Methods for processing data prior to and during analysis, including transcription, data entry, data management and security, verification of data integrity, data coding, and anonymization/de-identification of excerpts    | Page 4, lines 130-142 |
| 13<br>14<br>15<br>16  | <b>Data analysis</b> - Process by which inferences, themes, etc., were identified and developed, including the researchers involved in data analysis; usually references a specific paradigm or approach; rationale**                                 | Page 4, lines 130-142 |
| 17<br>18<br>19<br>20  | <b>Techniques to enhance trustworthiness</b> - Techniques to enhance trustworthiness and credibility of data analysis (e.g., member checking, audit trail, triangulation); rationale**                                                                | Page 4, lines 135-142 |

## Results/findings

|                            |                                                                                                                                                                                                   |                                                           |
|----------------------------|---------------------------------------------------------------------------------------------------------------------------------------------------------------------------------------------------|-----------------------------------------------------------|
| 23<br>24<br>25<br>26       | <b>Synthesis and interpretation</b> - Main findings (e.g., interpretations, inferences, and themes); might include development of a theory or model, or integration with prior research or theory | Pages 4-8, lines 145-338                                  |
| 27<br>28<br>29<br>30<br>31 | <b>Links to empirical data</b> - Evidence (e.g., quotes, field notes, text excerpts, photographs) to substantiate analytic findings                                                               | Pages 4-8, lines 145-338 (quotes and excerpts throughout) |

## Discussion

|                                        |                                                                                                                                                                                                                                                                                                                                                                                                             |                           |
|----------------------------------------|-------------------------------------------------------------------------------------------------------------------------------------------------------------------------------------------------------------------------------------------------------------------------------------------------------------------------------------------------------------------------------------------------------------|---------------------------|
| 34<br>35<br>36<br>37<br>38<br>39<br>40 | <b>Integration with prior work, implications, transferability, and contribution(s) to the field</b> - Short summary of main findings; explanation of how findings and conclusions connect to, support, elaborate on, or challenge conclusions of earlier scholarship; discussion of scope of application/generalizability; identification of unique contribution(s) to scholarship in a discipline or field | Pages 8-9, lines 339-410  |
| 41<br>42                               | <b>Limitations</b> - Trustworthiness and limitations of findings                                                                                                                                                                                                                                                                                                                                            | Pages 9-10, lines 411-430 |

## Other

|                |                                                                                                                                               |                        |
|----------------|-----------------------------------------------------------------------------------------------------------------------------------------------|------------------------|
| 45<br>46<br>47 | <b>Conflicts of interest</b> - Potential sources of influence or perceived influence on study conduct and conclusions; how these were managed | Page 10, lines 456-457 |
| 48<br>49       | <b>Funding</b> - Sources of funding and other support; role of funders in data collection, interpretation, and reporting                      | Page 10, lines 444-447 |

\*The authors created the SRQR by searching the literature to identify guidelines, reporting standards, and critical appraisal criteria for qualitative research; reviewing the reference lists of retrieved sources; and contacting experts to gain feedback. The SRQR aims to improve the transparency of all aspects of qualitative research by providing clear standards for reporting qualitative research.

1  
2  
3  
4  
5  
6  
7  
8  
9  
10  
11  
12  
13  
14  
15  
16  
17  
18  
19  
20  
21  
22  
23  
24  
25  
26  
27  
28  
29  
30  
31  
32  
33  
34  
35  
36  
37  
38  
39  
40  
41  
42  
43  
44  
45  
46  
47  
48  
49  
50  
51  
52  
53  
54  
55  
56  
57  
58  
59  
60

\*\*The rationale should briefly discuss the justification for choosing that theory, approach, method, or technique rather than other options available, the assumptions and limitations implicit in those choices, and how those choices influence study conclusions and transferability. As appropriate, the rationale for several items might be discussed together.

**Reference:**

O'Brien BC, Harris IB, Beckman TJ, Reed DA, Cook DA. **Standards for reporting qualitative research: a synthesis of recommendations.** *Academic Medicine*, Vol. 89, No. 9 / Sept 2014  
DOI: 10.1097/ACM.0000000000000388

For peer review only
